# Tailored chemical reactivity probes for systemic imaging of aldehydes in fibroproliferative diseases

Hua Ma<sup>1</sup>, Iris Y. Zhou<sup>1</sup>, Y. Iris Chen<sup>1</sup>, Nicholas J. Rotile<sup>1</sup>, Ilknur Ay<sup>1</sup>, Eman Akam<sup>1</sup>, Huan Wang<sup>1</sup>, Rachel Knipe<sup>2</sup>, Lida P. Hariri<sup>2,3</sup>, Caiyuan Zhang<sup>1</sup>, Matthew Drummond<sup>2</sup>, Pamela Pantazopoulos<sup>1</sup>, Brianna F. Moon<sup>1</sup>, Avery T. Boice<sup>1</sup>, Samantha E. Zygmunt<sup>1</sup>, Jonah Weigand-Whittier<sup>1</sup>, Mozhdeh Sojoodi<sup>4</sup>, Romer A. Gonzalez-Villalobos<sup>5</sup>, Michael K. Hansen<sup>5</sup>, Kenneth K. Tanabe<sup>4</sup>, Peter Caravan<sup>1</sup>

<sup>1</sup>Athinoula A. Martinos Center for Biomedical Imaging, Institute for Innovation in Imaging (*i<sup>3</sup>*), Department of Radiology, Massachusetts General Hospital, Harvard Medical School, Boston, USA.

<sup>2</sup>Division of Pulmonary and Critical Care Medicine and the Center for Immunology and Inflammatory Diseases, Massachusetts General Hospital, Boston, MA, USA.

<sup>3</sup>Department of Pathology, Massachusetts General Hospital, Harvard Medical School, Boston, USA.

<sup>4</sup>Division of Gastrointestinal and Oncologic Surgery, Massachusetts General Hospital, Harvard Medical School, Boston, Massachusetts 02114, United States

<sup>5</sup>Cardiovascular and Metabolism Discovery, Janssen Research and Development LLC, Boston, MA, USA

## Abstract

During fibroproliferation, protein-associated extracellular aldehydes are formed by the oxidation of lysine residues on extracellular matrix proteins to form the aldehyde allysine. Here we report three Mn(II)-based, small molecule magnetic resonance (MR) probes that contain  $\alpha$ -effect nucleophiles to target allysine in vivo and report on tissue fibrogenesis. We used a rational design approach to develop turn-on probes with a 4-fold increase in relaxivity upon targeting. The effects of aldehyde condensation rate and hydrolysis kinetics on the performance of the probes to detect tissue fibrogenesis noninvasively in mouse models were evaluated by a systemic aldehyde tracking approach. We showed that for highly reversible ligations, off-rate was a stronger predictor of in vivo efficiency, enabling histologically validated, three-dimensional characterization of pulmonary fibrogenesis throughout the entire lung. The exclusive renal elimination of these probes allowed for rapid imaging of liver fibrosis. Reducing the hydrolysis rate by forming an oxime bond with allysine enabled delayed phase imaging of kidney fibrogenesis. The imaging efficacy of these probes, coupled with their rapid and complete elimination from the body, make them strong candidates for clinical translation.

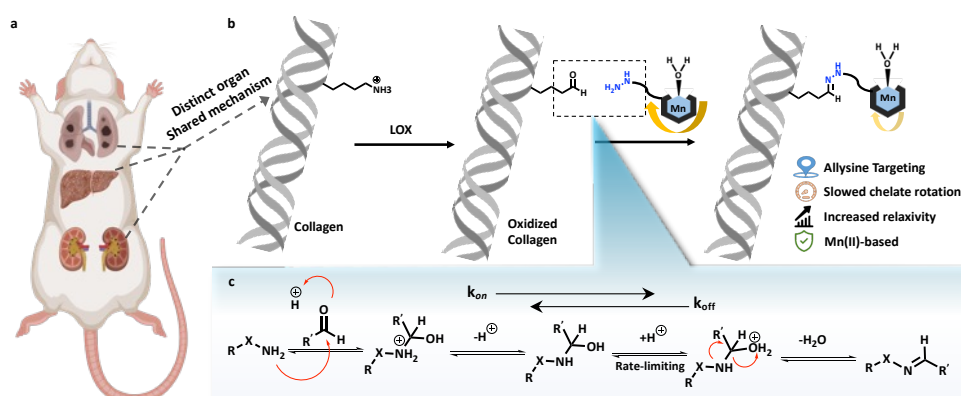

**Fig. 1 | Chemical reactivity probes can systemically target aldehydes for quantitative molecular imaging of fibrogenesis. a**, Fibrosis can occur in any organ and is characterized by

1 spatially heterogeneous fibrotic foci, wherein lysine residues are converted to the aldehyde  
2 allysine while the adjacent tissue remains normal. Precise monitoring of fibrotic disease  
3 activity calls for fine-tuning of targeting kinetics. Created with BioRender.com. **b**, Taking  
4 advantage of the condensation reaction between hydrazine (or oxyamine) and aldehyde,  
5 allysine-targeted Mn(II)-based molecular MR imaging probes can be rationally designed with  
6 relaxivity “turned on” upon binding for increased detection sensitivity. **c**. Breakdown of the  
7 tetrahedral intermediate is the rate-limiting step of condensation reaction between  
8 nucleophile (hydrazine or oxyamine) and aldehyde, providing a large variation in reaction  
9 kinetics to meet the organ-specific physiological demands.

## 11 Main

12 Electrophilic carbonyls such as ketones and aldehydes are generally considered rare in  
13 mammalian biology, existing at low concentrations in homeostasis and only transiently due  
14 to their reactivity in a nucleophilic environment. This is especially true in the extracellular  
15 space<sup>1, 2</sup>. Indeed, the scarcity of extracellular carbonyls has led to the development of  
16 bioorthogonal conjugation chemistry involving aldehydes. For example, Bertozzi’s early work  
17 on modifying cell surfaces relied on the integration of keto sialic acid to cell-surface glycans,  
18 which then can be covalently ligated by hydrazine or oxyamine under physiological  
19 conditions<sup>3, 4</sup>. Paulson and co-workers introduced aldehydes into cell-surface sialic acid  
20 residues and then captured the modified glycoproteins by reaction with aminooxybiotin  
21 followed by streptavidin chromatography<sup>5</sup>. Taking advantage of the small size and  
22 compatibility in living systems, aldehyde/ketone have been utilized as labeling blocks or  
23 targeting warheads for bioorthogonal ligation<sup>6-8</sup>.

24 An important aldehyde in the extracellular matrix (ECM) is the amino acid allysine which is  
25 formed by the oxidation of lysine residues by the enzyme lysyl oxidase (LOX) and its paralogs<sup>9</sup>.  
26 Allysine formed on collagens (or elastin) undergoes a series of condensation and  
27 rearrangement reactions with other collagens that result in irreversible bonds that crosslink  
28 the proteins and stabilize the ECM. Outside of development and wound healing, tissue levels  
29 of LOX and allysine are low in healthy, mature mammals. However, if the tissue is damaged  
30 then LOX is upregulated while the tissue is being remodeled<sup>10</sup>. We have found that lung and  
31 liver tissue allysine concentrations can be in the hundreds of micromolar during such  
32 pathological processes<sup>11, 12</sup>.

33 About half of mortality in the industrialized world is caused by a disease that has a  
34 fibroproliferative component<sup>13, 14</sup>. Fibrosis is characterized by tissue scarring, and as  
35 functional tissue is replaced by scar, the organ becomes less compliant and dysfunctional.  
36 When progressive, fibrosis leads to organ failure and/or death. In organs like liver, fibrosis has  
37 been shown to promote tumor formation<sup>15</sup>. Many cancers also have a fibrotic component  
38 that is believed to promote tumor growth and shield cancer from chemo- or  
39 immunotherapy<sup>16</sup>. Common diseases associated with fibrosis are non-alcoholic  
40 steatohepatitis (NASH)<sup>17</sup>, chronic kidney disease (CKD)<sup>18</sup>, heart failure (Fig. 1a)<sup>19</sup>, but there  
41 are also less common fibrotic diseases such as idiopathic pulmonary fibrosis (IPF)<sup>20</sup>, and all of  
42 them cause significant morbidity and mortality. A major unmet need across all of these  
43 diseases is the ability to measure disease activity noninvasively<sup>21, 22</sup>, which could help identify  
44 the early onset of disease, could distinguish between an active disease that is progressing  
45 from stable scar, could provide prognostic information, or could be used to monitor response  
46 to therapy.

1 The high concentration of allysine during fibrogenesis makes it amenable to detection by  
 2 a targeted magnetic resonance (MR) probe molecule<sup>12, 23-26</sup>. The general absence of  
 3 aldehydes in the ECM of healthy tissue suggests that an extracellular, aldehyde-targeted  
 4 probe would have high specificity for fibroproliferative disease activity. There are several  
 5 considerations in designing a molecular probe for noninvasive sensing of extracellular  
 6 aldehydes in the body by MRI<sup>27</sup>. The probe should produce a strong MR signal change and  
 7 requires an appropriate MR signal generator like a Gd<sup>3+</sup> or Mn<sup>2+</sup> chelate. The probe should  
 8 be metabolically stable in vivo such that the MR signal reflects the distribution of the probe  
 9 and not metabolites. For liver imaging applications, it is important that the probe not  
 10 accumulate in the liver or undergo hepatobiliary elimination, as this would increase the  
 11 background signal. Since MR relaxation probes function by changing the existing MR signal,  
 12 i.e. they are contrast agents, it is necessary to acquire an image before and after administering  
 13 the probe to see the signal change induced by the probe. The ideal probe would accumulate  
 14 rapidly and be retained at its target immediately after injection, but the unbound probe would  
 15 be rapidly eliminated to minimize nonspecific signal enhancement. Because the dose required  
 16 for molecular MRI is fairly high (mg metal ion per kg body weight), it is also important that  
 17 the probe is ultimately eliminated from the body. Finally, since we are targeting extracellular  
 18 aldehydes, it is important that the probe have an extracellular distribution to minimize any  
 19 background signal from intracellular aldehydes.

20 In this study, we describe three novel, extracellular aldehyde targeting probes that  
 21 comprise a Mn<sup>2+</sup> chelate conjugated to an aldehyde reactive moiety. As an aldehyde reactive  
 22 group, we used either alkyl hydrazine, an alpha-carboxylate alkyl hydrazine, and an alpha-  
 23 carboxylate oxyamine. These designs enabled us to examine the effects of aldehyde  
 24 condensation rate and condensation product hydrolysis rate on the in vivo performance of  
 25 the probes for aldehyde sensing in mouse models of lung, liver, and kidney fibrosis.

26  
 27  
 28

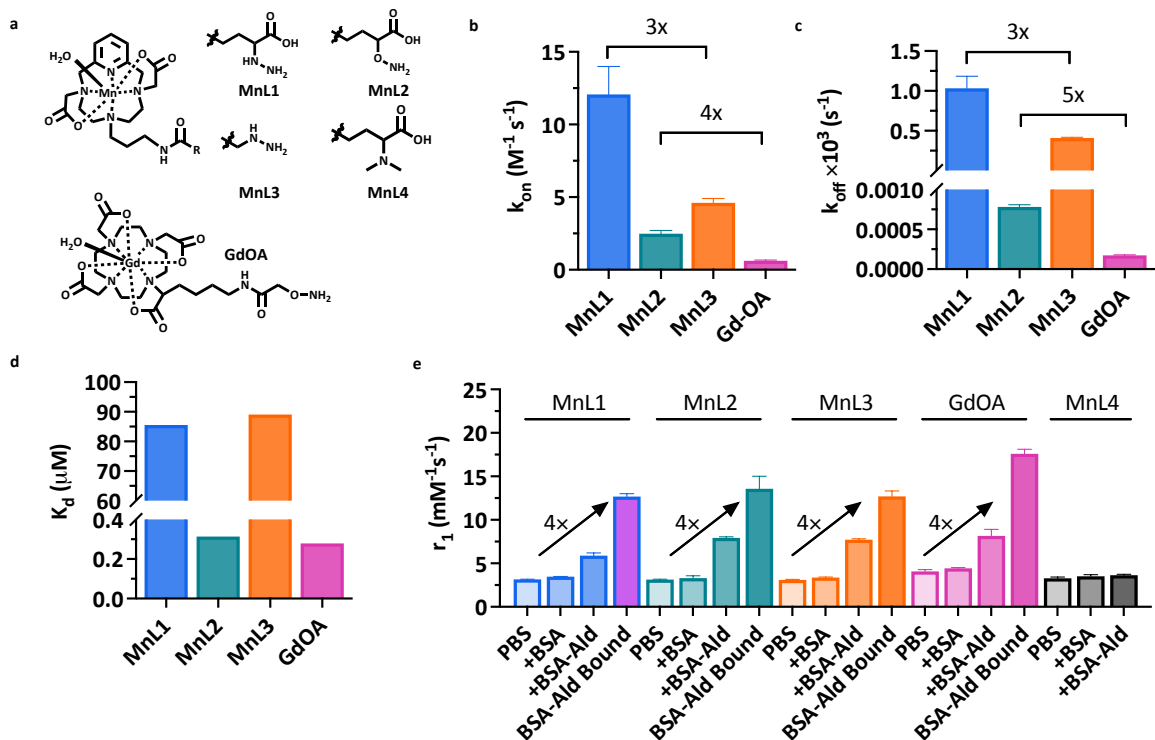

29

1 **Fig. 2 | Design and characterization of extracellular aldehyde-targeted MR probes.** **a**,  
2 Structure of novel MnPC2A-based complexes and the known compound GdOA. **b**, Second  
3 order rate constant ( $k_{on}$ ) for the reaction of MnL1, MnL2, MnL3, and GdOA with  
4 butyraldehyde (pH 7.4, PBS, 25 °C; data presented as mean  $\pm$  s.d.,  $n = 3$  independent samples).  
5 **c**, Hydrolysis rate constant ( $k_{off}$ ) of condensation products (data presented as mean  $\pm$  s.d.,  $n =$   
6  $3$  independent samples). **d**, Dissociation constant ( $K_d$ ) of condensation reaction between  
7 hydrazine/oxyamine-based probes with butyraldehyde calculated as the ratio  $k_{off}/k_{on}$ . **e**,  
8 Relaxivities of MnL1, MnL2, MnL3, MnL4, and GdOA in PBS, in BSA, in allysine-modified BSA-  
9 Ald, and of the BSA-Ald bound species (1.4 T, 37°C. Data presented as mean  $\pm$  s.d.,  $n = 3$   
10 independent samples).  
11

## 12 **Results**

### 13 **Design and characterization of aldehyde-targeting MR probes.**

14 We designed our probes, Fig. 2a, on the symmetric macrocyclic Mn(PC2A)(H<sub>2</sub>O) core which  
15 contains one rapidly exchanging coordinated water co-ligand and is thermodynamically stable  
16 and kinetically inert with respect to Mn<sup>2+</sup> dissociation in vivo<sup>28</sup>. The PC2A chelator was readily  
17 derivatized at the N7 position to introduce an aldehyde reactive group, either an alkyl  
18 hydrazine or oxyamine moiety, as these groups undergo fast reversible condensation  
19 reactions with aldehydes. Hydrazines typically have faster aldehyde condensation rates than  
20 oxyamines at neutral pH, but the hydrolysis rate of the resultant hydrazone is much faster  
21 than that of an oxime. For the condensation reaction, dehydration of the tetrahedral  
22 intermediate is typically the rate-limiting step and the reaction proceeds under general acid  
23 catalysis<sup>29</sup>. Substitution of an acidic moiety adjacent to the hydrazine/oxyamine will  
24 accelerate the condensation reaction but may also catalyze the back reaction. MnL1 and  
25 MnL2 allow for the direct comparison between a hydrazine and an oxyamine. MnL1 and  
26 MnL3 allow for the direct comparison of the effect of the  $\alpha$ -carboxylate of reaction kinetics  
27 and subsequent in vivo performance. We also compare MnL2 to the historic compound GdOA  
28 to assess the effect of the  $\alpha$ -carboxylate on oxyamine condensation/hydrolysis kinetics. MnL4  
29 was synthesized as a structurally matched negative control, which should have similar  
30 pharmacokinetic properties as MnL1, MnL2, and MnL3, but is incapable of undergoing  
31 condensation with allysine. All the complexes are very hydrophilic which should minimize  
32 non-specific protein binding and reduce the fraction of hepatobiliary elimination.

33 Each of the Mn(II) complexes was synthesized starting from the macrocycle pyclen,  
34 followed by regioselective alkylation of the N4 and N10 positions using *tert*-butyl-  
35 bromoacetate at pH 8. Next, the N7-position was alkylated with *N*-(3-  
36 Bromopropyl)phthalimide, and the primary amine liberated by reaction with hydrazine. This  
37 common intermediate was used to prepare each of the Mn(II) probes by conventional amide  
38 bond formation with the appropriate synthon to introduce  $\alpha$ -carboxylate substituted  
39 hydrazine,  $\alpha$ -carboxylate substituted oxyamine, terminal hydrazine, or dimethylamine group.  
40 After TFA-promoted deprotection and subsequent Mn(II) chelation, we accessed the four  
41 Mn(II) probes. The synthetic procedures are fully described in Supplementary Information.  
42 Each compound was purified and characterized using standard methods (preparative HPLC,  
43 <sup>1</sup>H NMR, <sup>13</sup>C NMR, LC-MS, ICP-MS, and LC-ICP-MS; please see Methods and Supplementary  
44 Information for details).

45 The condensation reaction rate constants with butyraldehyde were measured by UV  
46 spectroscopy under pseudo-first-order conditions with respect to each probe (Supplementary

1 Information). As shown in Fig. 2b and Supplementary Fig. 1, introduction of the  $\alpha$ -carboxylate  
2 moiety led to 3 – 4 fold higher condensation reaction rates: MnL1 had a second-order rate  
3 constant of  $12.1 \pm 1.9 \text{ M}^{-1}\text{s}^{-1}$  compared to  $4.6 \pm 0.3 \text{ M}^{-1}\text{s}^{-1}$  for MnL3; MnL2 had a second-order  
4 rate constant of  $2.5 \pm 0.2 \text{ M}^{-1}\text{s}^{-1}$  compared to  $0.6 \pm 0.1 \text{ M}^{-1}\text{s}^{-1}$  for GdOA. This result confirmed  
5 the hypothesis that intramolecular acidic condition would facilitate the condensation reaction  
6 between hydrazine/oxyamine and aldehyde. Then, the hydrolysis of hydrazone and oxime  
7 products with butyraldehyde were investigated by HPLC. Following Kalia and Raines<sup>30</sup>, we  
8 used an excess of formaldehyde to trap the liberated nitrogen base and thereby push the  
9 hydrolysis reaction to completion without interference from the reverse (condensation)  
10 reaction. As shown in Fig. 1c and Supplementary Fig. 2, MnL1-hydrazone hydrolysis is 3-times  
11 faster than MnL3-hydrazone, and MnL2-oxime hydrolysis is 5-times faster than GdOA. In  
12 other words, the  $\alpha$ -carboxylate moiety accelerates condensation and hydrolysis to a similar  
13 extent. Measurement of the on- and off-rate constants allowed us to compute the  
14 dissociation constant ( $K_d$ ) as the ratio  $k_{\text{off}}/k_{\text{on}}$  (Fig. 1d). The much slower off-rate of the oxime  
15 hydrolysis resulted in 2 orders of magnitude lower  $K_d$  for MnL2 and GdOA compared to MnL1  
16 and MnL3. However, since the  $\alpha$ -carboxylate moiety accelerates condensation and hydrolysis  
17 equally, there was little difference in  $K_d$  between MnL1 and MnL3.

18 MR probes are characterized by their relaxivity,  $r_1$ , which is the change in solvent  $1/T_1$   
19 caused by adding the probe, normalized to the probe concentration. We measured relaxivity  
20 (1.4 T, 37 °C, pH 7.4) of each complex in phosphate-buffered saline (PBS) and then again in  
21 PBS containing bovine serum albumin (BSA). The four Mn complexes exhibited similar  $r_1$   
22 values (about  $3.1 \text{ mM}^{-1}\text{s}^{-1}$ ) in PBS, consistent with one coordinated water ligand (Fig. 1e). The  
23 presence of a single coordinated water co-ligand was confirmed by temperature-dependent  
24  $\text{H}_2^{17}\text{O}$  transverse relaxation rates using the method of Gale et al. (Supplementary Fig. 3)<sup>31</sup>. In  
25 the presence of excess BSA there was little to no relaxivity enhancement, indicating low  
26 nonspecific protein binding. We next measured the relaxivity of each complex in the presence  
27 of oxidized BSA wherein about 4 lysine side chains on BSA were oxidized to allysine, and we  
28 used this allysine-modified BSA (BSA-Ald, 43.8 mg mL<sup>-1</sup>, 1.2 mM aldehyde) as water-soluble  
29 model aldehyde bearing protein<sup>32, 33</sup>. In the presence of BSA-Ald (3 h incubation, 37°C), the  
30 relaxivity increased by 90%, 150%, 150%, and 100% ( $5.9 \text{ mM}^{-1}\text{s}^{-1}$ ,  $7.9 \text{ mM}^{-1}\text{s}^{-1}$ ,  $7.7 \text{ mM}^{-1}\text{s}^{-1}$ ,  
31 and  $8.2 \text{ mM}^{-1}\text{s}^{-1}$ ) for MnL1, MnL2, MnL3, and GdOA, respectively, relative to their relaxivity  
32 values in PBS. We then separated the unbound probe from the BSA-Ald bound probe by  
33 ultrafiltration with a molecular weight cutoff filter (Supplementary Fig. 4) and then measured  
34 the relaxivity of the protein-bound species. The protein-bound relaxivities were 4 times  
35 higher than the relaxivity of the unbound probe ( $12.7 \text{ mM}^{-1}\text{s}^{-1}$ ,  $13.6 \text{ mM}^{-1}\text{s}^{-1}$ ,  $12.7 \text{ mM}^{-1}\text{s}^{-1}$ ,  
36 and  $17.6 \text{ mM}^{-1}\text{s}^{-1}$  for MnL1, MnL2, MnL3, and GdOA respectively). In comparison, the  
37 relaxivities of non-reactive control probe MnL4 were unchanged from PBS to BSA or BSA-Ald,  
38 indicating a lack of protein binding for the control probe. At a higher magnetic field of 4.7 T  
39 where the imaging studies were performed, the relaxivity of BSA-Ald bound probes was also  
40 significantly enhanced compared to the unbound form (113% increase for MnL1, 115%  
41 increase for MnL2, 115% increase for MnL3, Supplementary Fig. 5).

42 The thermodynamic stability constant of  $\text{Mn}^{2+}$  with the unmodified PC2A ligand was  
43 reported to be  $\log K_{\text{MnPC2A}} = 17.09$ <sup>28</sup>, and we expect similar stability with the complexes here.  
44 We assessed the kinetic inertness of the 4 Mn complexes described here by transmetalation  
45 experiments with an excess of  $\text{Zn}^{2+}$ , which should form more stable complexes than  $\text{Mn}^{2+}$   
46 based on its position in the Irving-Williams series<sup>34</sup>. The Mn(II) complexes were incubated  
47 with 25 equivalents of  $\text{Zn}^{2+}$  at 37 °C, in pH 6.0 MES buffer, and changes in the paramagnetic

1 longitudinal relaxation rate ( $\%R_1^P$ ) were used as readout. Under this condition, any free  $Mn^{2+}$   
2 released by chelator will cause an increase in  $R_1^P$  owing to the higher relaxivity of the  $Mn^{2+}$   
3 aqua ion. Mn-PyC3A, which is currently being developed as an MRI probe and was shown to  
4 be excreted from animals in its intact form, was measured as a comparative benchmark<sup>35</sup>.  
5 Measured pseudo-first-order rate constants were  $2.5 \pm 0.1 \times 10^{-4}$ ,  $2.4 \pm 0.3 \times 10^{-4}$ ,  $2.3 \pm 0.3$   
6  $\times 10^{-4}$ ,  $2.2 \pm 0.4 \times 10^{-4}$ , and  $5.5 \pm 0.4 \times 10^{-4} s^{-1}$  for MnL1, MnL2, MnL3, MnL4, and Mn-PyC3A,  
7 respectively (Supplementary Fig. 6). Since the Mn-PC2A derivatives reported here are twice  
8 as inert as Mn-PyC3A, we expect these complexes to also be stable in vivo with respect to  
9  $Mn^{2+}$  dissociation.

10 The stabilities of MnL1, MnL2, MnL3, and MnL4 in human plasma were also assessed using  
11 HPLC coupled to ICP-MS (LC-ICP-MS) to measure the formation of any new Mn-containing  
12 species (Supplementary Fig. 7). Incubation of 1.0 mM complex in human plasma at 37 °C for  
13 1 h resulted in the formation of up to 18 % of new Mn-containing species for MnL1, up to 5%  
14 for MnL2, and up to 5% for MnL3, but no new Mn-containing species were observed when  
15 MnL4 was incubated with plasma. Since no new species were observed with the control probe,  
16 it is likely that the species formed in plasma are products of reactions with endogenous  
17 aldehyde or ketone-containing molecules.

## 20 **Distribution and pharmacokinetics in mice**

21 We next used MRI and positron emission tomography (PET) to evaluate the distribution,  
22 pharmacokinetics, and whole-body elimination of the probes in naïve C57Bl/6 mice. As shown  
23 in Supplementary Fig. 8a, intravenous administration of  $0.1 \text{ mmol} \cdot \text{kg}^{-1}$  of either MnL1, MnL2,  
24 MnL3, or MnL4 resulted in an immediate and marked increase in MR signal in the blood pool  
25 (aorta). We measured the percentage change in signal intensity (%SI) over time in the aorta,  
26 liver, and kidney and the data were fit with a monoexponential decay function to obtain the  
27 half-life of the probe in each tissue (Supplementary Fig. 8 b-d). All four probes displayed rapid  
28 and almost identical blood clearance with blood half-lives of  $7.1 \pm 1.2 \text{ min}$  (MnL1),  $7.0 \pm 1.4$   
29  $\text{min}$  (MnL2),  $7.1 \pm 1.0 \text{ min}$  (MnL3), and  $7.2 \pm 0.9 \text{ min}$  (MnL4). All probes were eliminated from  
30 the body via the kidneys. Only minimal and transient liver enhancement was observed and  
31 matched the blood pool kinetics. To measure whole-body elimination, we radiolabeled each  
32 probe with the Mn-52 isotope and performed PET imaging and ex vivo biodistribution analysis  
33 24 h post-injection of each probe in naïve C57Bl/6 mice. The high sensitivity of PET allows us  
34 to detect any trace levels of injected Mn-probe in the body and to distinguish the distribution  
35 and elimination of injected probe from endogenous Mn. Mice were injected a dose of MnL1,  
36 MnL2, MnL3 or MnL4 ( $0.1 \text{ mmol} \cdot \text{kg}^{-1}$ ) mixed with  $^{52}\text{MnL1}$ ,  $^{52}\text{MnL2}$ ,  $^{52}\text{MnL3}$ , or  $^{52}\text{MnL4}$   
37 respectively ( $1.0 - 1.2 \text{ MBq}$ , Supplementary Fig. 9) by intravenous injection and simultaneous  
38 PET-MRI was performed 24 h post-injection (Supplementary Fig. 10a). Finally, the organs were  
39 harvested for ex vivo biodistribution analysis. Data are presented as percentage injected dose  
40 per gram organ (%ID/g, Supplementary Fig. 10b). At 24 h post-injection, >96% of the injected  
41 Mn is eliminated from the mice (98.5% for MnL1, 96.3% for MnL2, 98.6% for MnL3, and 99.0%  
42 for MnL4). PET-MRI 24 h post-injection showed that most of the remaining activity was  
43 localized in the kidneys for each probe, except for MnL2 where we also observed signal in the  
44 skin. The skin is an organ with elevated LOX family expression as a result of the rapid  
45 turnover<sup>36, 37</sup>, given the much higher hydrolytic stability of the oxime bond, the higher  
46 retained activity from MnL2 is most likely due to binding to intrinsic allysine. An important  
47 observation in the PET study for all compounds was the absence of Mn-52 activity in the liver,

1 lymph nodes, bone, brain, and salivary glands of the mice, which would have been indicative  
2 of dechelated Mn-52, suggesting that these complexes remain intact in vivo.<sup>38</sup>

### 4 **Comparison of noninvasive aldehyde sensing in a mouse model of** 5 **pulmonary fibrogenesis.**

6 We next sought to compare the effects of differing on- and off-rates on noninvasive aldehyde  
7 sensing in vivo. We first used a bleomycin-induced lung fibrosis mouse model (BM). A single  
8 intratracheal (i.t.) dose of bleomycin results in rapid development of pulmonary fibrosis in  
9 mice, and we have previously shown that fibrogenesis and lung allysine levels peak at 14 days  
10 post injury<sup>39</sup>. Compared to naïve mice, bleomycin injury resulted in distorted lung  
11 architecture and increased cellular infiltration on hematoxylin and eosin (H&E) staining (Fig.  
12 3a), while Masson's trichrome staining revealed large regions of fibrosis (blue staining of  
13 collagen, Fig. 3b). Biochemical quantification of allysine showed a 2-fold increase in the  
14 content of this aldehyde in the BM-injured lungs (Fig. 3c) and collagen lung concentration as  
15 quantified by hydroxyproline (Fig. 3d), was also significantly elevated 1.3-fold.

16 As shown in Fig. 3e, f and Supplementary Fig. 12, from 10 min to 60 min post-injection,  
17 lung signal enhancement, expressed as the change in the lung signal to muscle signal ratio  
18 ( $\Delta$ LMR), from all four probes exhibited similar and rapid decreases in naïve mice,  
19 demonstrating fast elimination of the probes from normal lungs. In BM mice, the non-binding  
20 probe MnL4 produced higher  $\Delta$ LMR at 10 min post-injection compared to naïve mice,  
21 demonstrating an increased extracellular volume in BM-injured lungs. The MnL4 signal  
22 enhancement then exhibited fast decay. In comparison, higher and persistent contrast  
23 enhancement was observed in BM mice injected with hydrazine/oxyamine bearing probes,  
24 with significantly higher  $\Delta$ LMR than in naïve mice and significantly higher  $\Delta$ LMR than that of  
25 MnL4 in BM mice 60 min post-injection (Fig. 3g). Notably, the signal enhancement of MnL1  
26 and MnL3 in fibrotic lung kept decreasing from 10 min to 110 min post-injection, while the  
27 more hydrolytically stable MnL2 showed  $\Delta$ LMR reaching a plateau at 60 min post-injection  
28 and then remaining stable.

29 Interestingly, MnL3 exhibited superior signal enhancement compared to MnL1, which was  
30 confirmed by pairwise comparison in the same mice to mitigate the inter-animal  
31 heterogeneity of this model (Fig. 3h). MnL1 and MnL3 had similar equilibrium constants with  
32 aldehyde but different condensation and hydrolysis rates. Therefore, the greater  $\Delta$ LMR with  
33 MnL3 than MnL1 could be attributed to a slower off-rate with MnL3. We also measured the  
34 lung half-life ( $T_{1/2}$ ) of each probe by fitting the change in  $\Delta$ LMR with time (Fig. 3i,  
35 Supplementary Fig. 13). We found that both MnL1 and MnL3 had significantly longer  $T_{1/2}$  in  
36 BM mice compared with naïve mice or compared with MnL4 in BM mice. In BM mice, MnL3  
37 exhibited a significantly slower washout than MnL1 ( $T_{1/2} = 41.5 \pm 6.3$  min vs.  $33.6 \pm 5.1$  min,  $P$   
38 = 0.003), likely due to the greater hydrolytic stability of MnL3. MnL2, which forms a stable  
39 oxime bond, showed a very long  $T_{1/2}$  value that could not be determined based on the 2-hour  
40 imaging study.

41 Ex vivo determination of lung Mn content at 60 min post-injection of MnL1, MnL2, and  
42 MnL3 was significantly elevated in BM mice compared to naïve mice and significantly elevated  
43 compared to MnL4 administered to naïve or BM mice, in line with the findings from in vivo  
44 MRI (Fig. 3j). The MRI signal enhancement was highly correlated ( $R^2 > 0.84$ ) with lung allysine  
45 content (Fig. 3k). The slope of  $\Delta$ LMR vs allysine concentration was higher for MnL3 (0.015)  
46 than for MnL1 (0.011) indicating that MnL3 was 40% more sensitive in detecting fibrogenesis.

1 The  $\Delta$ LMR values also significantly correlated with hydroxyproline content in lungs for each  
 2 of the three aldehyde-targeted probes (Supplementary Fig. 14).

3  
 4

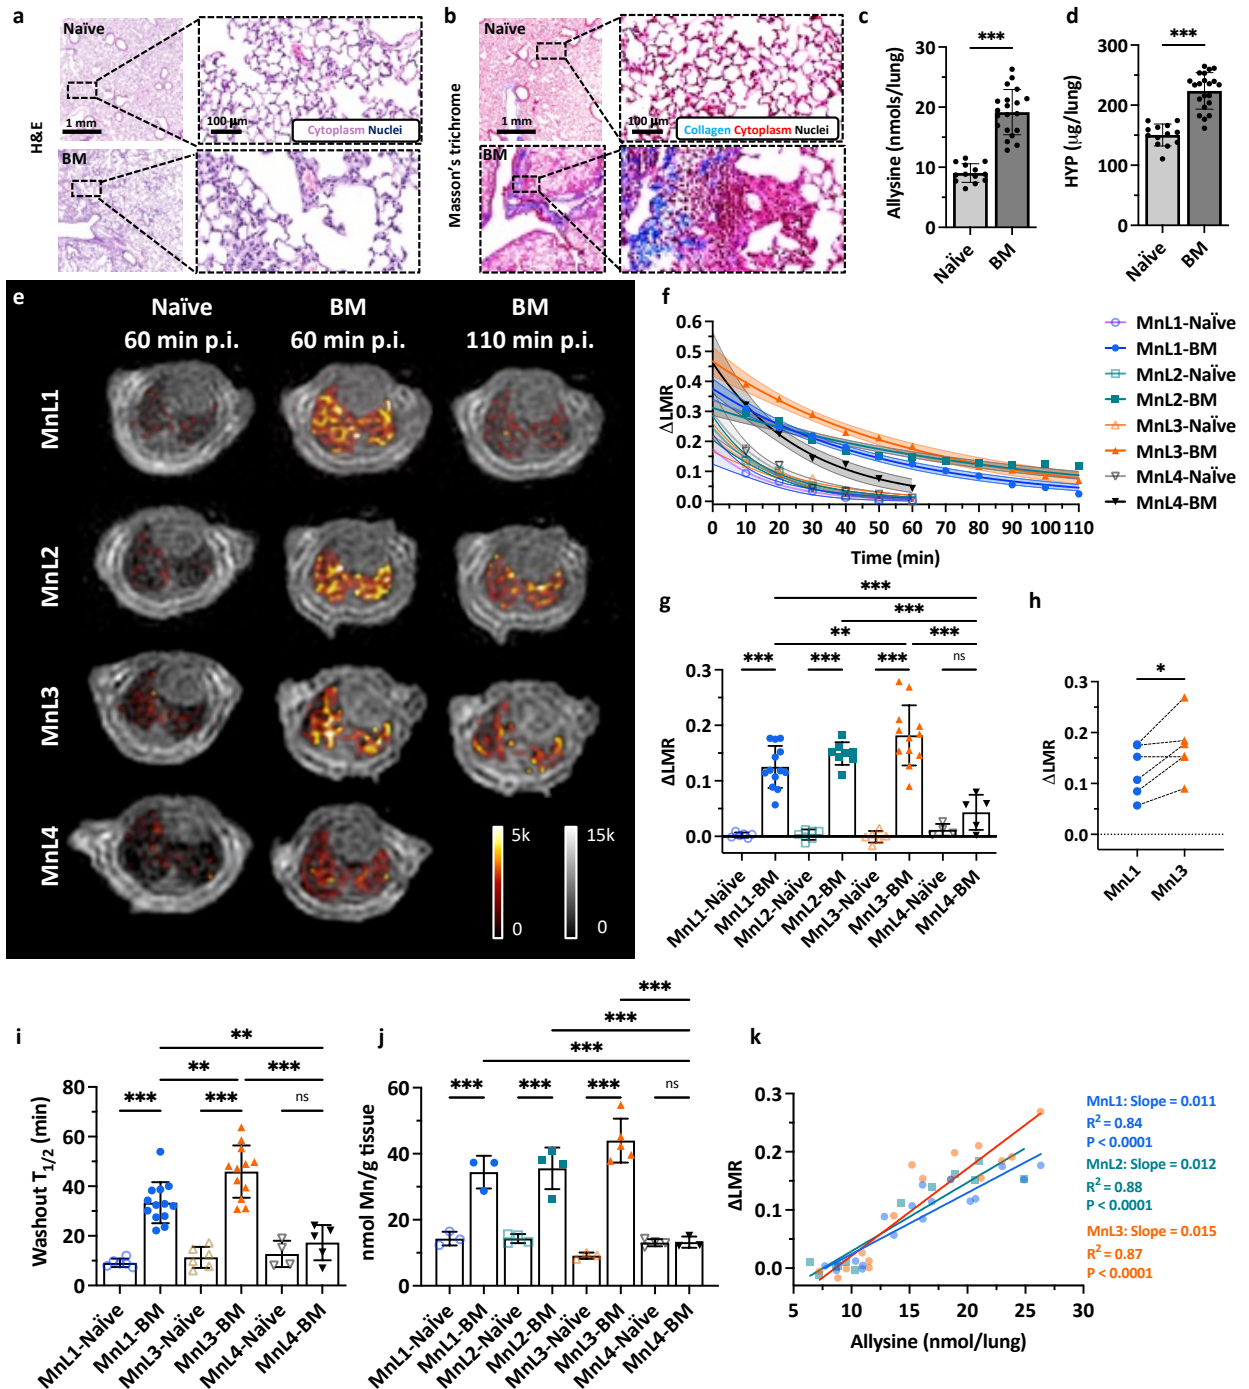

5  
 6 **Fig. 3 | Molecular MRI of bleomycin-induced lung fibrogenesis.** Representative H&E (a) and  
 7 Masson's trichrome (b) staining of lung section from naïve and BM mice. Bleomycin-injured  
 8 lung showed increased tissue density, cellularity, and collagen deposition compared with  
 9 normal lungs. Lung allysine (c) and hydroxyproline (HYP) (d) content were significantly  
 10 increased in BM mice compared with naïve mice. Data presented as mean  $\pm$  s.d.; n = 13 for  
 11 naïve mice, n = 20 for BM mice). Statistical analysis was performed using two-tailed unpaired  
 12 Student's *t* test, unpaired, \*\*  $p < 0.01$ , \*\*\*  $p < 0.001$ ). e, Representative lung enhancement



1 in naïve and BM mice. Coronal UTE images overlaid with false color image of lung  
2 enhancement generated by subtraction of the pre-injection UTE image from post-injection  
3 UTE image. MnL1, MnL2, and MnL3 produced higher signals in BM mice lungs than in naïve  
4 mice and higher signal in MnL4 injected naïve and BM mice at 60 min post-injection. **f**, Change  
5 of lung-to-muscle ratio ( $\Delta$ LMR) as a function of time in naïve and BM mice after injection of  
6 MnL1, MnL2, MnL3, and MnL4. Data are presented as mean value with 95% simultaneous  
7 confidence bands as shaded regions; Naïve mice: n = 6 for MnL1, MnL2, and MnL3, n = 4 for  
8 MnL4; BM mice: n = 13 injected with MnL1, n = 8 injected with MnL2, n = 12 injected with  
9 MnL3, and n = 5 injected with MnL4. **g**, Image quantification of  $\Delta$ LMR in lungs of naïve and  
10 BM mice 60 min post-injection of MnL1, MnL2, MnL3, and MnL4. Hydrazine/oxyamine  
11 bearing probes exhibited specific lung signal enhancement in the fibrotic lung. Data presented  
12 as mean  $\pm$  s.d. Statistical analysis was performed using one-way ANOVA with Tukey's post hoc  
13 test, \*\*P < 0.01, \*\*\*P < 0.001, ns not statistically significant). **h**, Pair-wise analysis of  $\Delta$ LMR in  
14 bleomycin-injured mice at 60 min post-injection of MnL1 and MnL3 (n = 6). Statistical analysis  
15 was performed using two-tailed paired Student's *t* test, \*P < 0.05. **i**, Washout  $T_{1/2}$  of MnL1,  
16 MnL3, and MnL4 in naïve and BM mice. MnL3, with higher hydrazone hydrolytic stability,  
17 exhibited longer residence time in fibrotic lungs. Data presented as mean  $\pm$  s.d.; Naïve mice:  
18 n = 6 for MnL1, and MnL3, n = 4 for MnL4; BM mice: n = 13 injected with MnL1, n = 12 injected  
19 with MnL3, and n = 5 injected with MnL4. Statistical analysis was performed using one-way  
20 ANOVA with Tukey's post hoc test, \*P < 0.05, \*\*\*P < 0.001, ns not statistically significant. **j**,  
21 Quantification of Mn content in the left lungs of naïve and BM mice 60 min after injection of  
22 MnL1, MnL2, MnL3, and MnL4. Injection of hydrazine/oxyamine-bearing probes produced  
23 significantly higher Mn concentrations in the fibrotic lung compared with normal lung. No  
24 preferential uptake was observed in naïve or BM mice injected with MnL4. Data are presented  
25 as mean  $\pm$  s.d.; Naïve mice: n = 3 for MnL1, n = 4 for MnL2, n = 3 for MnL3, n = 4 for MnL4;  
26 BM mice: n = 3 for MnL1, n = 4 for MnL2, n = 5 for MnL3, n = 3 for MnL4. Statistical analysis  
27 was performed using one-way ANOVA with Tukey's post hoc test, \*P < 0.05, \*\*P < 0.01, \*\*\*P <  
28 0.001, ns not statistically significant. **k**, The MRI lung signal enhancement in naïve and BM  
29 mice imaged with MnL1, MnL2, and MnL3 correlates well with allysine content. Compared  
30 with MnL1, MnL3 exhibited higher sensitivity in detecting fibrogenesis (slope<sub>MnL1</sub> = 0.011 vs.  
31 slope<sub>MnL3</sub> = 0.015).

32

### 33 **Noninvasive three-dimensional mapping of fibrogenesis**

34 IPF has a complex phenotype that is manifested by clinical, etiologic, and molecular  
35 heterogeneity. In fact, heterogeneity in the radiographic and pathologic features of usual  
36 interstitial pneumonia is required for the definitive diagnosis of IPF<sup>40</sup>. However, mapping lung  
37 fibrogenesis heterogeneity remains challenging with lung biopsy and other diagnostic  
38 modalities. The bleomycin-induced pulmonary fibrogenesis model exhibited strong  
39 heterogeneity mimicking the clinical condition. To validate the molecular MRI-based mapping  
40 of fibrogenesis with ex vivo histology BM mice were imaged pre- and 40 min post-injection of  
41 MnL3, and the %SI enhancement in each pixel was computed to generate a 3D signal  
42 enhancement (%SI) map representing the location and extent of fibrotic regions (Fig. 4a, 4b,  
43 and Supplementary Video). Following imaging, the injured lung was harvested, fixed, serially  
44 sectioned, and stained with Masson's trichrome for the presence of fibrosis (blue staining, Fig.  
45 4c). We next segmented the blue color in the serial histology images and generated a fibrosis  
46 density map for comparison with the corresponding MR %SI map in Fig. 4d; the rest of mice  
47 can be seen in Supplementary Fig.15. From the histological representation of fibrosis density,

1 we found the upper-right lobe (dashed line) of this lung exhibited severe fibrotic disease,  
 2 followed by left lobe (dot-and-dash line), while the lower-right lobe was less fibrotic.  
 3 Consistently, the corresponding MRI map exhibited a similar pattern of signal enhancement  
 4 after the injection of the fibrogenesis-sensing probe MnL3. These results demonstrate how  
 5 MnL3-based molecular MRI can noninvasively track whole lung fibrosis disease activity, and  
 6 potentially replace, or complement conventional invasive lung histology.  
 7

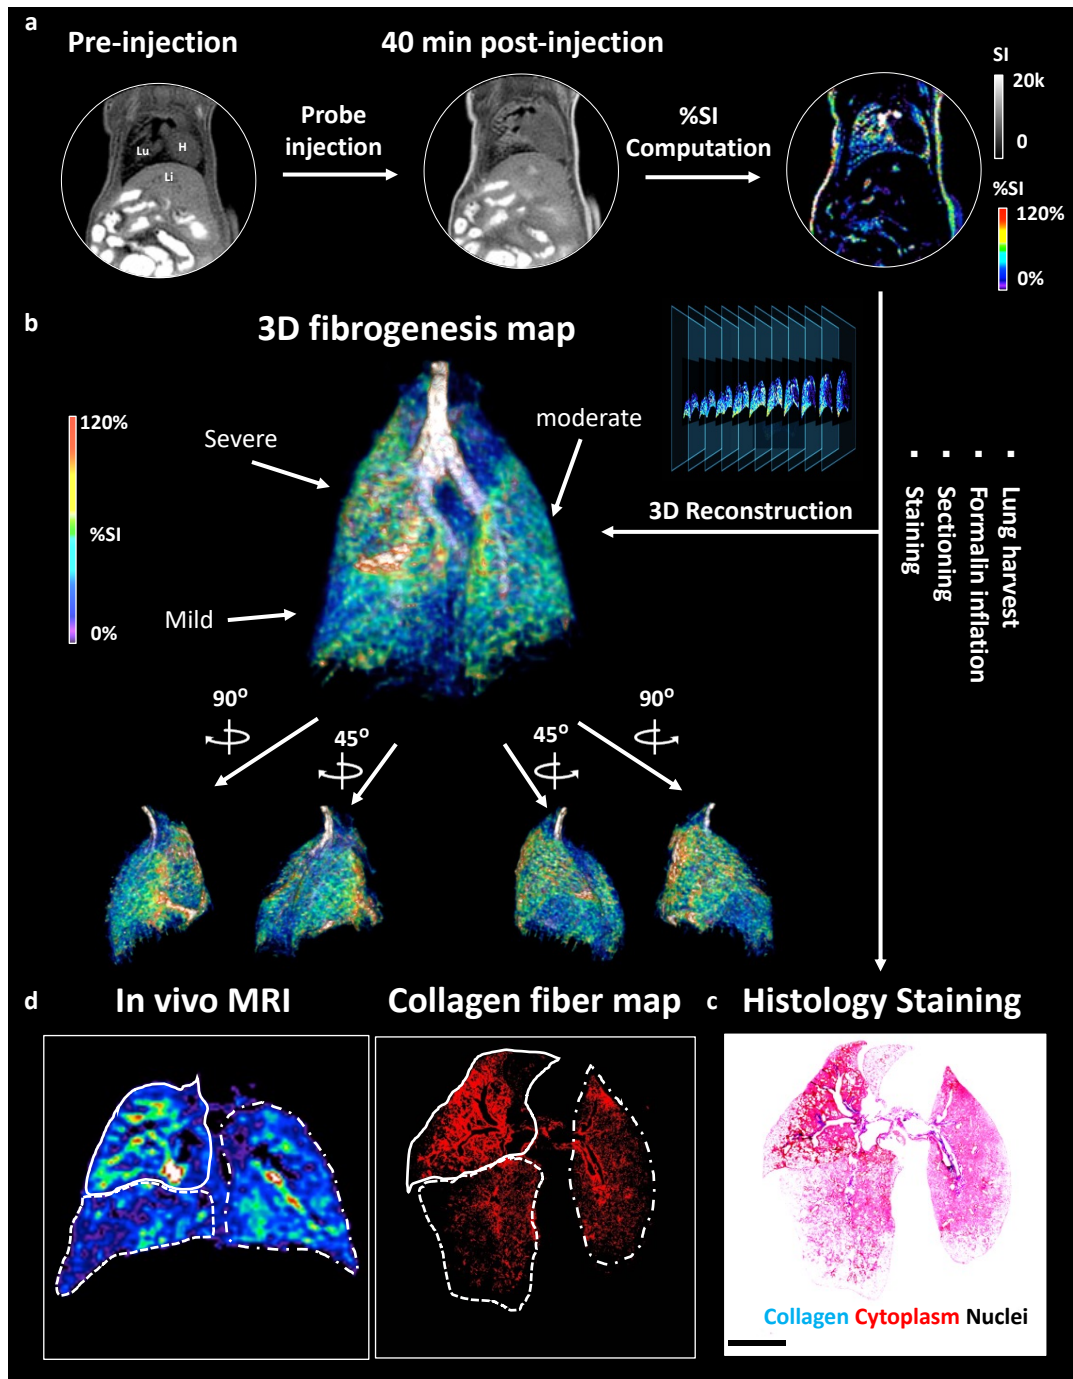

8  
 9 **Fig. 4 | 3D mapping of lung fibrogenesis and histology validation.** **a**, Representative UTE  
 10 images of BM mouse pre- and 40 min post-injection of MnL3 were acquired and a pixelwise  
 11 signal enhancement map was generated (Lu: lung; Li: liver; H: heart). **b**, 3D whole lung  
 12 fibrogenesis MR map of the fibrotic lung. **c**, Masson's Trichrome staining. After in vivo imaging,  
 13 the lung was harvested, fixed, serially sectioned, and stained was performed to validate the

1 MR images. **d**, In vivo MRI signal enhancement exhibited the same fibrotic distribution pattern  
2 compared to ex vivo histology.

3

#### 4 **MnL1 detection of liver fibrogenesis**

5 After confirming the specificity of MnL1 in targeting fibrogenesis in the lung, we then  
6 tested whether MnL1-enhanced MRI could detect liver fibrogenesis in a toxin-induced fibrosis  
7 model. Carbon tetrachloride (CCl<sub>4</sub>) is a well-established toxin that when administered  
8 repeatedly results in liver fibrosis and ultimately hepatocellular carcinoma<sup>39</sup>. In this study,  
9 liver fibrosis was induced in 8-week-old male C57BL/6 mice by oral gavage of 40% CCl<sub>4</sub> diluted  
10 in olive oil for 12 weeks, and vehicle-treated mice were used as controls. Fig. 5a shows that  
11 MnL1 administration rapidly produced a significant liver signal enhancement in CCl<sub>4</sub>-treated  
12 mice but not in control mice. Change in the liver-to-muscle contrast to noise ratio ( $\Delta$ CNR)  
13 was higher in CCl<sub>4</sub>-treated mice, while the liver only transiently enhanced in vehicle-treated  
14 control mice (Fig. 5b).  $\Delta$ CNR was 3-fold higher at 20 minutes post-injection, and the area  
15 under the  $\Delta$ CNR curve was significantly larger in CCl<sub>4</sub> treated mice than in vehicle-treated  
16 mice (Fig. 5c), demonstrating the potential for imaging liver fibrogenesis with MnL1.

17

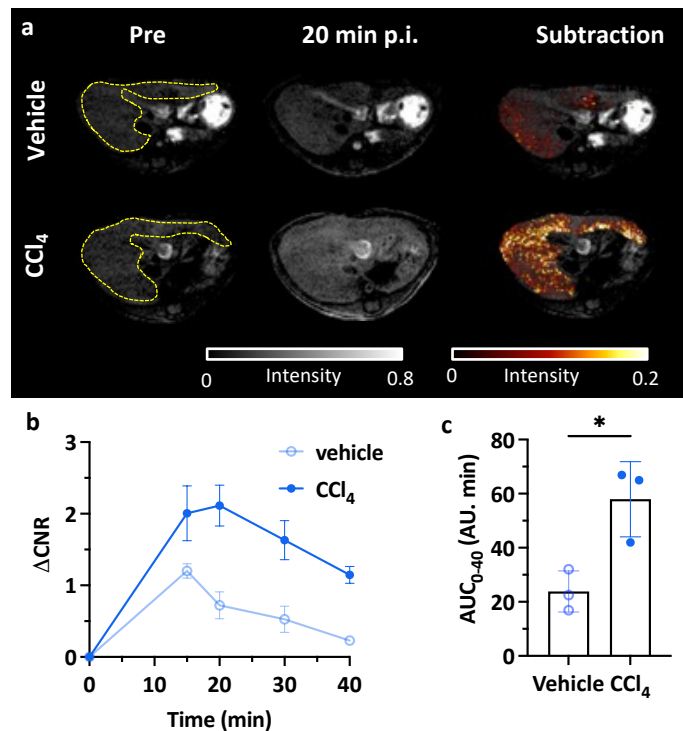

18

19 **Fig. 5 | Molecular MRI of hepatic fibrogenesis.** **a**, Representative axial MR images showing  
20 the livers of mice that received olive oil vehicle (top row) or CCl<sub>4</sub> (bottom row) for 12 weeks;  
21 left: image before MnL1 administration, middle 20 min post-injection of MnL1, and right  
22 subtraction of post – pre injection image. **b**, Change in liver-to-muscle contrast to noise ratio  
23 ( $\Delta$ CNR = CNR<sub>Post</sub> - CNR<sub>Pre</sub>) of vehicle-treated and CCl<sub>4</sub> mice as a function of time following i.v.  
24 injection of MnL1 (Data presented as mean  $\pm$  s.d.; n = 3 for each group). **c**, Significant  
25 difference in the area under the  $\Delta$ CNR curve (AUC<sub>0-40</sub>) between vehicle and CCl<sub>4</sub> mice. Data  
26 presented as mean  $\pm$  s.d.; n = 3 for each group; Statistical analysis was performed using two-  
27 tailed unpaired Student's *t* test, two-tailed unpaired, \*P < 0.05.

28

29 **Superior hydrolytic stability of the oxime bond enables molecular MR of renal fibrogenesis**

1 Molecular imaging of the kidney is particularly challenging because almost all probes are  
2 eliminated to some extent through the kidneys, resulting in a high background signal. To  
3 achieve specific molecular imaging of the kidneys, one must wait sufficient time for the  
4 nonspecific background renal signal to diminish and the probe must remain bound to its  
5 target for this extended period. Here we tested whether the oxyamine probe MnL2 could be  
6 used to detect renal fibrosis. We also sought to test whether the 4-fold higher condensation  
7 rate constant for MnL2 compared to a previously reported probe GdOA would result in  
8 greater signal enhancement in fibrotic kidney.

9 We used a unilateral renal ischemia-reperfusion injury (IRI) mouse model (Supplementary  
10 Fig. 16) where one kidney is clamped and then reperfused. This results in initial inflammation  
11 and cell death that then gives way to tissue fibrosis<sup>41</sup>. We evaluated mice at 14 days after IRI  
12 and demonstrated fibrosis in both the renal cortex and medulla by histology (Fig. 6a) and by  
13 quantifying the biochemical biomarker hydroxyproline (Fig. 6b). Fig. 6a shows obvious  
14 collagen deposition in the cortex and medulla of the IRI kidney, but not in the healthy kidney.  
15 Consistent with histological staining, hydroxyproline concentrations in the IRI kidney were  
16 significantly higher than in the healthy kidney for both cortex and medulla (3.1-times higher  
17 than the cortex of healthy kidney; 2.8-times higher than the medulla of the healthy kidney;  $p$   
18  $< 0.001$ ). Lysyl oxidase like 1 (LOXL 1) and LOXL 2 enzymes are both upregulated in the IRI  
19 kidney (Supplementary Fig. 17)

20 We measured kidney T1 values at 9.4 T prior to and 4 hours after injecting the probe. In  
21 naïve mice, both probes were effectively eliminated from the kidneys by 4 h post-injection.  
22 We computed T1 maps on a pixel basis and then measured the mean R1 ( $R1 = 1/T1$ ) for cortex  
23 and medulla, respectively. We then calculated the change in relaxation rate ( $\Delta R1 = R1_{Post} -$   
24  $R1_{Pre}$ ) induced by the probe as a measure of probe concentration in that tissue. In both cortex  
25 and medulla of the IRI kidney,  $\Delta R1$  after MnL2 injection was significantly higher than for those  
26 regions of healthy kidneys. Using GdOA, we also observed significantly larger  $\Delta R1$  in the  
27 injured kidney compared to healthy mice, demonstrating that both oxyamine-containing  
28 probes can be used to image renal fibrogenesis. These findings were supported by ex vivo  
29 quantification of gadolinium and manganese in these tissues (Supplementary Fig. 18). In  
30 comparing the in vivo performance of MnL2 and GdOA, the increase in  $\Delta R1$  was 30% higher  
31 for MnL2 in the cortex of the IRI kidney than GdOA and was 40% higher than GdOA in the  
32 medulla. This result demonstrated that the 4-fold higher condensation rate constant with  
33 MnL2 translated into improved in vivo performance for detection of renal fibrogenesis.

34 Here we used a unilateral IRI model and thus the contralateral kidney, which did not  
35 undergo IRI served as an internal control to the IRI kidney. We performed intra-animal  
36 comparisons between  $\Delta R1$  in the contralateral kidney and the IRI kidney for MnL2 and GdOA  
37 (Supplementary Fig. 19). For GdOA,  $\Delta R1$  was significantly higher in the IRI medulla compared  
38 to the contralateral medulla ( $p < 0.001$ ), but there was no significant difference in the renal  
39 cortex. For MnL2, on the other hand,  $\Delta R1$  was significantly increased in the cortex and  
40 medulla of the IRI kidney compared to those regions in the contralateral kidney ( $p = 0.03$  for  
41 cortex;  $p = 0.003$  for medulla).

42

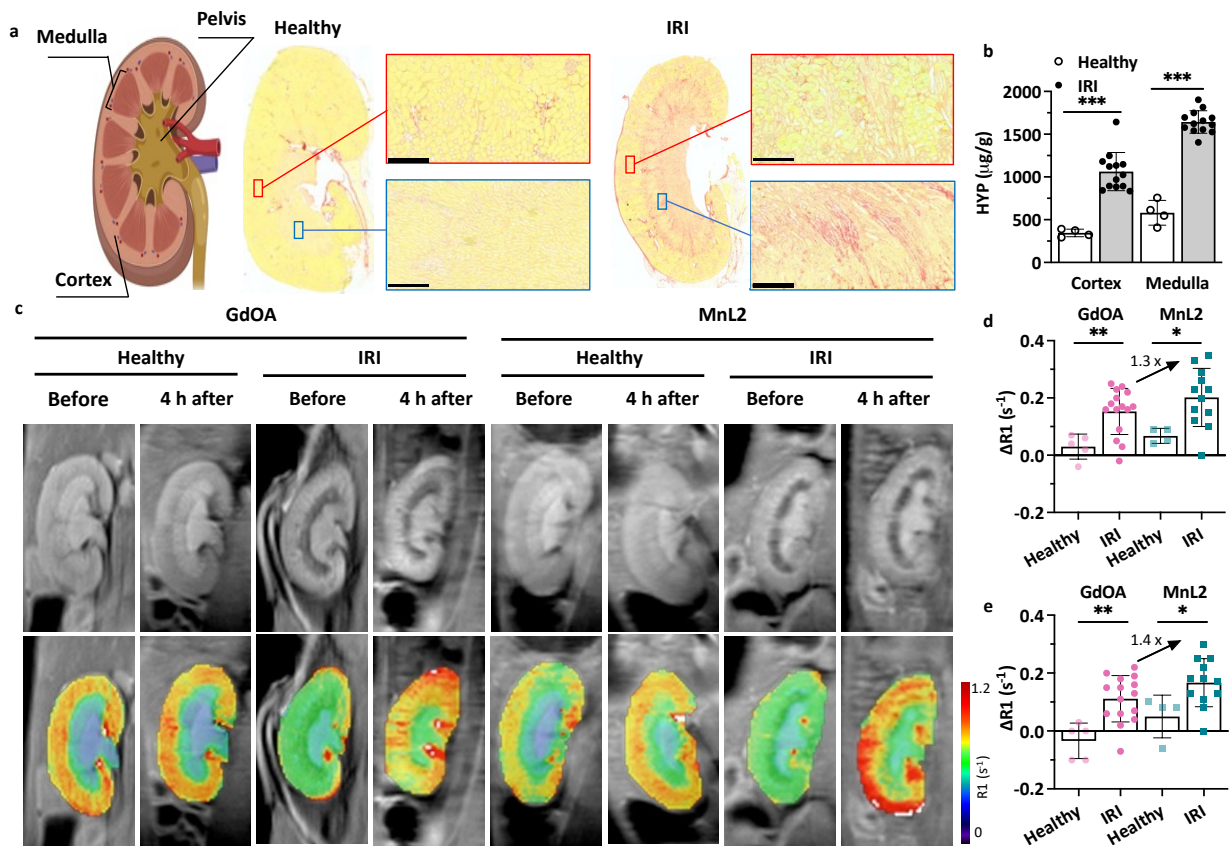

1  
2 **Fig. 6 | Molecular MRI of renal fibrogenesis.** **a**, Left: schematic of anatomy of kidney; middle:  
3 Sirius Red stained kidney section from a naïve mouse (healthy); right: Sirius Red stained  
4 kidney section from a kidney with ischemia-reperfusion injury (IRI) 14 days prior (collagen:  
5 red, normal tissue yellow; scale bar:250  $\mu\text{m}$ ). IRI kidney showed increased collagen in the  
6 cortex and medulla compared with the healthy kidney. **b**, IRI kidneys showed significantly  
7 higher hydroxyproline concentration in the cortex and medulla compared to healthy kidneys.  
8 Data are presented as mean  $\pm$  s.d.;  $n = 13$  for IRI kidney,  $n = 4$  for healthy kidney. Statistical  
9 analysis was performed using Student's  $t$  test, two-tailed, \*\*\*  $p < 0.001$ . **c**, Representative  
10 mouse MR images showing kidneys of healthy mice and mice 14 days post-IRI. Images are  
11 shown before and 4 hours after injection of GdOA or MnL2. Top row shows greyscale kidney  
12 anatomy MR image and bottom row shows R1 maps calculated from inversion recovery  
13 images. **d**, Quantification of  $\Delta R1$  ( $R1(4 \text{ h post}) - R1(\text{pre})$ ) in cortex of healthy and IRI injured  
14 mice administered GdOA or MnL2. MnL2 and GdOA exhibited similar low  $\Delta R1$  values in  
15 healthy mice, but both probes showed significantly higher  $\Delta R1$  values in the IRI kidney. MnL2  
16 with a higher condensation reaction rate constant compared to GdOA, resulting in higher  $\Delta R1$   
17 than GdOA in the IRI kidney. Data are presented as mean  $\pm$  s.d.; Naïve healthy mice:  $n = 5$  for  
18 GdOA,  $n = 4$  for MnL2; IRI mice:  $n = 15$  for GdOA,  $n = 11$  for MnL2. Statistical analysis  
19 was performed using two-tailed unpaired Student's  $t$  test, unpaired, \* $P < 0.05$ , \*\* $P < 0.01$ . **e**,  
20 Quantification of  $\Delta R1$  ( $R1(4 \text{ h post}) - R1(\text{pre})$ ) in medulla of healthy and IRI mice administered  
21 GdOA or MnL2. MnL2 and GdOA exhibited similar low  $\Delta R1$  values in healthy mice, but both  
22 probes showed significantly higher  $\Delta R1$  values in the IRI kidney. MnL2 with a higher  
23 condensation reaction rate constant compared to GdOA, resulting in higher  $\Delta R1$  than GdOA  
24 in the IRI kidney. Data are presented as mean  $\pm$  s.d.; Naïve healthy mice:  $n = 5$  for GdOA,  $n =$   
25  $4$  for MnL2; IRI mice:  $n = 15$  for GdOA,  $n = 11$  for MnL2. Statistical analysis was performed  
26 using two-tailed unpaired Student's  $t$  test, unpaired, \* $P < 0.05$ , \*\* $P < 0.01$ .

## Discussion

Fibrosis-related diseases present an enormous burden to society. These diseases range from myocardial infarction and hypertrophic cardiomyopathy in the heart<sup>19</sup>, to Crohn's disease in the intestine<sup>42</sup>, to scleroderma in the skin<sup>43</sup>. IPF is a progressive fibrosing disease of the lung with worse outcomes than many types of cancers<sup>44</sup>. NASH is a chronic liver disease that afflicts approximately 5% of the population in the United States and can lead to cirrhosis, liver failure, primary liver cancer, and/or death<sup>16, 45</sup>. Chronic kidney disease (CKD) is a progressive disease that ultimately leads to renal failure<sup>18</sup>. All these diseases present unmet diagnostic challenges for example in improved early diagnosis, improved prognostication, and monitoring treatment and disease progression. A noninvasive test that could address some or all these needs would be expected to have an enormous impact.

To address this unmet need, we designed molecular probes that target the extracellular aldehyde allysine, which is increased during fibrogenesis. We used MR imaging because of its ability to image any organ in the body with three-dimensional high-resolution images and its operator-independent characteristic. In addition, MR imaging does not require ionizing radiation, which is particularly important for chronic diseases where patients may require multiple imaging exams over their lifetime. We designed small, hydrophilic probes that do not exhibit appreciable nonspecific protein binding to promote rapid renal elimination and minimize hepatobiliary elimination. The lack of hepatobiliary elimination provided a low background in the liver to enable liver imaging applications.

The three aldehyde-targeting Mn(II) probes had similar properties with respect to relaxivity, water exchange kinetics, and kinetic stability of the Mn(II)-PC2A chelate. The relaxivities of MnL1, MnL2, and MnL3 were relatively low ( $3.1 \text{ mM}^{-1}\text{s}^{-1}$ ) when measured in PBS but exhibited a 4-fold turn-on in relaxivity when bound to aldehyde modified BSA at 1.4 T. Importantly, the relaxivity increase was negligible in unmodified BSA, indicating that these compounds do not exhibit appreciable nonspecific protein binding. In a  $\text{Zn}^{2+}$  challenge assay, the Mn probes were about twice as inert to transmetalation as the complex Mn-PyC3A, which has been evaluated in several animal models and is currently undergoing clinical trials. These stable, hydrophilic Mn(II) probes also exhibited similar pharmacokinetic behavior in healthy mice: rapid renal elimination with blood elimination half-lives typical of compounds with no protein binding; exclusive renal elimination; and nearly complete elimination of injected Mn from the body after 24 hours.

The probes differed however in their kinetics of condensation with aldehydes and hydrolysis of the resultant hydrazone or oxime bond. All three probes bind specifically to fibrogenic injured mouse lung in vivo. However, lung MR signal enhancement appears to depend on a balance of on- and off-rates. The  $\alpha$ -carboxy hydrazine bearing MnL1 exhibited the highest condensation rate constant, but its fibrotic lung-enhancing properties were significantly inferior to MnL3 which lacked the  $\alpha$ -carboxy group. On the other hand, the hydrolysis rate constant for the MnL3 hydrazone was 3-fold lower than the MnL1 hydrazone suggesting that off-rate may be a better predictor of in vivo performance. The  $\alpha$ -carboxy oxyamine bearing MnL2 probe had a hydrolysis rate constant that was 3 orders of magnitude smaller than MnL3, but also a 2-fold lower condensation rate constant than MnL3. For the first 30 min after injection, the fibrotic lung signal enhancement with MnL3 was significantly greater than that with MnL2, perhaps indicating that signal enhancement will increase with increasing on-rate provided that the back reaction is relatively slow. Interestingly by 2 h post-injection, the fibrotic lung signal enhancement from MnL3 has diminished as the probe was



1 washed out of the tissue, but the lung enhancement with MnL2 has reached a plateau owing  
2 to the slow hydrolysis of the oxime bond.

3 For applications, these probes offer different options to characterize the fibroproliferative  
4 disease. The hydrazine-based probe MnL3 enables specific imaging of fibrogenesis shortly  
5 after intravenous administration. The relatively fast hydrolysis of the hydrazone, compared  
6 to an oxime, results in the elimination of the probe from the body after the imaging study is  
7 performed. We showed here that MnL3-enhanced MRI of the lung allows for three-  
8 dimensional characterization of pulmonary fibrogenesis throughout the entire lungs.  
9 Pulmonary fibrosis can affect any part of the lungs – upper or lower, right or left, subpleural  
10 or mid lung – and methods that assess the whole lungs are needed. Clinical techniques like  
11 high-resolution computed tomography (HRCT) can report on the distribution of advanced  
12 fibrosis throughout the whole lungs, but HRCT does not report disease activity<sup>46</sup>. Lung biopsy  
13 provides rich data but only samples a single, very small region of the lung that may not be  
14 reflective of the whole lung and is a procedure that carries the risk of complications and  
15 mortality<sup>47</sup>. Endobronchial optical coherence tomography provides high-resolution images of  
16 specific lung regions but again does not report on disease activity<sup>48</sup>.

17 We also showed that MnL1-enhanced MR could detect and quantify liver fibrogenesis  
18 within 20 minutes post-injection. In chronic liver diseases like NASH, ultrasound elastography  
19 or MR elastography or serum biomarker panels have shown value in detecting the presence  
20 of advanced fibrosis<sup>49</sup>. However, these methods are insensitive to detecting fibrosis at earlier  
21 stages and do not assess fibrotic disease activity<sup>50</sup>. Prior work in animal models showed that  
22 imaging liver fibrogenesis may enable the detection of the earliest stages of liver fibrosis and  
23 that imaging disease activity can provide an early readout of response to therapy<sup>12</sup>.

24 Extending molecular imaging of fibrosis/fibrogenesis to the kidneys is particularly  
25 challenging because of the high nonspecific renal signal enhancement as the probe clears  
26 through the kidneys. Furthermore, many molecular probes, especially peptide-based probes,  
27 are retained in the kidneys. In the MnL2-enhanced MR study of pulmonary fibrosis, we found  
28 that the lung signal reached a plateau and that we could not estimate a washout rate of MnL2  
29 from the fibrotic lung over two hours period because the lung signal was not changing. This  
30 finding led us to test whether this in vivo hydrolytic stability could be exploited for delayed  
31 imaging of the kidney. Our results showed that MnL2 could indeed be used to specifically  
32 detect renal fibrosis in IRI model by imaging the mice before and 4 hours post intravenous  
33 injection of MnL2. Using T1 mapping, we could accurately quantify fibrogenesis throughout  
34 the kidney and segment disease within the cortex and medulla. We also showed that the  
35 faster on-rate with MnL2 compared to GdOA resulted in greater MR signal enhancement in  
36 diseased tissue, again demonstrating the importance of optimizing the reactivity of these  
37 probes toward aldehydes.

38 In conclusion, this study provides insight into the design of molecular MR probes for  
39 noninvasive sensing of extracellular aldehydes and how they might be deployed to  
40 characterize human diseases. These probes have a high potential for clinical translation given  
41 the straightforward syntheses that are amenable to scale-up. While we did not assess the  
42 safety and toxicology of the probes, we note that their lack of nonspecific protein binding,  
43 lack of cellular uptake in vivo, rapid renal elimination, and whole-body elimination of injected  
44 Mn are all favorable properties that should limit the potential for adverse effects. We showed  
45 that the probes exhibit a 4-fold increase in relaxivity upon binding to protein containing  
46 aldehyde at 1.4 T, near the frequently used clinical field strength of 1.5 T. Our animal  
47 experiments were performed at 4.7 T and 9.4 T where the turn-on effect is much lower, e.g.

1 2-fold increase at 4.7 T. Thus, we expect the signal enhancement in clinical scanners to be  
2 higher than what we measured here. While we demonstrated the utility of these probes in  
3 mouse models of lung, liver, and kidney disease, such probes would likely prove valuable in  
4 other fibroproliferative diseases, including the heart, intestines, blood vessels, skin, etc.

## 6 Methods

7 **The details of chemical syntheses, chromatography methods, in vitro characterizations of**  
8 **probes, animals and experimental groups, and post-imaging ex vivo analysis protocols are**  
9 **provided in the Supplementary Information.**

### 11 General synthetic procedures

12 The general synthetic procedure is shown below using MnL3 as an example. Detailed  
13 synthetic procedures of all the other compounds are available in the supplementary  
14 information.

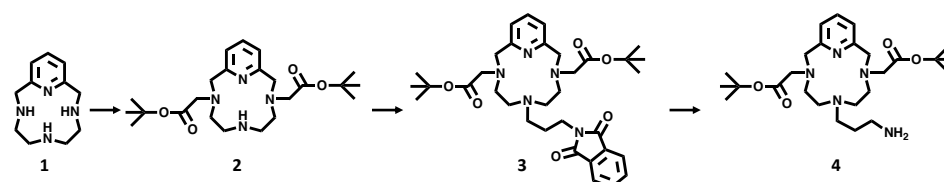

16 Synthesis of amino-functionalized macrocyclic 4

### 19 Regioselective alkylation of the compound 2

20 The starting material **1** (1.03 g, 5.0 mmol) was dissolved in a mixed solvent containing 50 mL  
21 DI water and 25 mL 1,4-dioxane and the pH was adjusted to 8.5 with concentrated HCl. To  
22 this solution, *tert*-butyl bromoacetate (1.37 g, 7.0 mmol) dissolved in 1,4-dioxane (25 mL) was  
23 added dropwise. The addition of more *tert*-butyl bromoacetate was repeated twice (2x0.23  
24 g, 0.48 mmol) after 12 h and 24 h and the pH was adjusted to 8.5 with 1N NaOH. Reaction  
25 completion was monitored by LC-MS (method 1). The reaction mixture was extracted with  
26 CHCl<sub>3</sub> (3x50 mL) and the combined organic phase was evaporated to dry under reduced  
27 pressure. The obtained residue was purified *via* flash chromatography (C18 column, method  
28 7 with A and B as solvents) to give **2** as a pale brown oil (1.37 g, 63%). <sup>1</sup>H NMR (500 MHz,  
29 Chloroform-*d*) δ 7.63 – 7.49 (m, 1H), 7.01 (dd, *J* = 7.7, 1.7 Hz, 2H), 3.96 (s, 4H), 3.50 (s, 4H),  
30 3.36 (t, *J* = 5.5 Hz, 4H), 2.98 (t, *J* = 6.1 Hz, 4H), 1.44 (s, 18H). <sup>13</sup>C NMR (126 MHz, Chloroform-*d*)  
31 δ 171.20, 160.12, 137.70, 120.42, 81.64, 57.72, 57.45, 51.83, 46.24, 28.29. LC-MS (method  
32 1): *t*<sub>R</sub>=3.35 min, *m/z* = 435.3 [M+H]<sup>+</sup>; calcd: 435.3.

### 35 N7-alkylation of macrocyclic 2

36 Compound **2** (0.86 g, 2.0 mmol) and K<sub>2</sub>CO<sub>3</sub> (0.54 g, 4.0 mmol) were suspended in dry ACN (40  
37 mL) and N-(3-Bromopropyl)phthalimide (0.8 g, 3.0 mmol) in dry ACN (20 mL) was added  
38 dropwise. The suspension was brought to reflux under argon for 12h. Following removal of  
39 the precipitate by filtration, the reaction mixture was concentrated under reduced pressure  
40 and then purified via chromatography (method 7 with mobile phase A and B) to give **3** as a  
41 yellow oil (1.18g, 95%). <sup>1</sup>H NMR (500 MHz, Chloroform-*d*) δ 7.82 (dt, *J* = 5.6, 2.9 Hz, 2H), 7.71  
42 (dt, *J* = 5.7, 2.8 Hz, 2H), 7.59 (t, *J* = 7.7 Hz, 1H), 7.02 (d, *J* = 7.6 Hz, 2H), 3.97 (s, 4H), 3.79 (q, *J* =  
43 6.3 Hz, 2H), 3.69 – 3.49 (m, 4H), 3.39 (s, 6H), 3.16 (s, 4H), 2.16 (dt, *J* = 15.3, 7.0 Hz, 2H), 1.40



1 (s, 18H). <sup>13</sup>C NMR (126 MHz, Chloroform-*d*) δ 169.95, 168.31, 159.29, 138.18, 134.40, 131.86,  
2 123.58, 120.91, 82.10, 58.54, 58.00, 52.39, 50.20, 45.79, 35.59, 28.20, 21.84. LC-MS (method  
3 1): t<sub>R</sub>=3.32 min, m/z = 622.3 [M+H]<sup>+</sup>; calcd: 622.4.

4  
5

### 6 Liberation of primary amine

7 Compound **3** (0.62g, 1 mmol) and hydrazine hydrate (2.5 g, 50 mmol) were dissolved in  
8 ethanol (20 mL) and the solution was stirred for 1h at 45°C. This mixture was diluted with  
9 acetonitrile (20 mL), and the precipitate was removed by filtration and the solvent was  
10 removed by reduced pressure. The obtained crude product was purified *via* flash  
11 chromatography (C18 column, method 7 with mobile phase A and B) to give **4** as a yellow oil  
12 (0.41g, 85%). <sup>1</sup>H NMR (500 MHz, Chloroform-*d*) δ 7.60 (t, *J* = 7.7 Hz, 1H), 7.03 (d, *J* = 7.7 Hz,  
13 2H), 3.93 (s, 4H), 3.60 – 3.39 (m, 6H), 3.38 – 3.26 (m, 4H), 3.23 – 3.12 (m, 4H), 3.12 – 3.00 (m,  
14 2H), 2.22 (dd, *J* = 10.2, 6.5 Hz, 2H), 1.41 (s, 18H). <sup>13</sup>C NMR (126 MHz, Chloroform-*d*) δ 170.51,  
15 159.56, 138.25, 120.87, 81.99, 58.24, 57.97, 51.92, 50.18, 43.69, 36.89, 28.08, 19.56. LC-MS  
16 (method 1): t<sub>R</sub>=2.742 min, m/z = 492.5 [M+H]<sup>+</sup>; calcd: 492.4. <sup>1</sup>H NMR (500 MHz, Chloroform-*d*)  
17 δ 7.61 (t, *J* = 7.7Hz, 1H), 7.04 (d, *J* = 7.7 Hz, 2H), 4.08 – 3.86 (m, 4H), 3.54 – 3.30 (m, 12H),  
18 3.28 – 2.96 (m, 6H), 2.05 (m, 2H), 1.44 (s, 18H), 1.41 (s, 9H). <sup>13</sup>C NMR (126 MHz, Chloroform-*d*)  
19 δ 171.66, 170.46, 170.24, 159.59, 159.44, 138.46, 121.02, 82.29, 58.39, 57.95, 54.76, 51.87,  
20 50.31, 44.55, 36.20, 28.34, 28.18, 21.56. LC-MS (method 1): t<sub>R</sub>=3.27 min, m/z = 664.4 [M+H]<sup>+</sup>;  
21 calcd: 664.6.

22

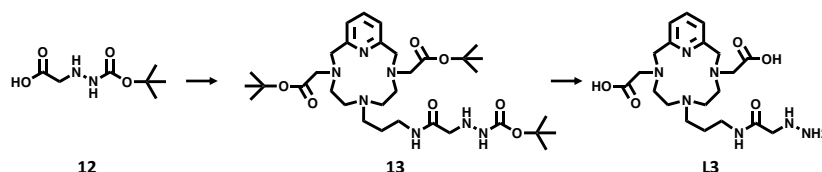

23  
24  
25

Synthesis of alkyl hydrazine-bearing macrocyclic **4**

### 26 Coupling between amino functionalized macrocyclic and targeting moiety

27 Compound **4** (0.25 g, 0.5 mmol), compound **12** (0.14 g, 0.75 mmol), and *N,N*-  
28 diisopropylethylamine (0.13 g, 1.0 mmol) were dissolved in dry acetonitrile (20 mL), and HATU  
29 (0.29 g, 0.75 mmol) in dry acetonitrile (10 mL) was added. The reaction mixture was stirred at  
30 room temperature for 45 min. After evaporating under reduced pressure, the obtained oil  
31 was redissolved in dichloromethane and extracted with 10% citric acid aqueous solution and  
32 brine. The organic layer was dried (Na<sub>2</sub>SO<sub>4</sub>) and concentrated under reduced pressure. The  
33 crude product was purified *via* flash chromatography (C18 column, method 7 with mobile  
34 phase A and B to give **13** as a yellow oil (0.26 g, 79%). <sup>1</sup>H NMR (500 MHz, Chloroform-*d*) δ 7.61  
35 (t, *J* = 7.7Hz, 1H), 7.04 (d, *J* = 7.7 Hz, 2H), 4.08 – 3.86 (m, 4H), 3.54 – 3.30 (m, 12H), 3.28 – 2.96  
36 (m, 6H), 2.05 (m, 2H), 1.44 (s, 18H), 1.41 (s, 9H). <sup>13</sup>C NMR (126 MHz, Chloroform-*d*) δ 171.66,  
37 170.46, 170.24, 159.59, 159.44, 138.46, 121.02, 82.29, 58.39, 57.95, 54.76, 51.87, 50.31,  
38 44.55, 36.20, 28.34, 28.18, 21.56. LC-MS (method 1): t<sub>R</sub>=3.27 min, m/z = 664.4 [M+H]<sup>+</sup>; calcd:  
39 664.6.

40

### 41 TFA-promoted deprotection

42 To compound **13** (132.7 mg, 0.2 mmol) in dichloromethane (5 mL) cooled to 0 °C, was added  
43 anisole (0.4 mL, 2 mL/mmol, cation scavenger) followed by the slow addition of trifluoroacetic

1 acid (5 mL) and the mixture was stirred at 0 °C for 1 h followed by room temperature for 4 h.  
2 The solvent and trifluoroacetic acid were gently evaporated under reduced pressure and the  
3 resulting oily residue was dissolved in water (5 mL) and the organic byproducts were pipetted  
4 away with diethyl ether (3 x 5 mL). The aqueous layer was freeze-dried, and the obtained  
5 crude product was purified by preparative HPLC ( C18 column, method 8 with A and B as  
6 solvent) to give **L3** as a white solid (69.5 mg, 77%). <sup>1</sup>H NMR (500 MHz, D<sub>2</sub>O) δ 8.25 (t, *J* = 7.9  
7 Hz, 1H), 7.63 (d, *J* = 7.9 Hz, 2H), 4.39 (s, 4H), 3.77 (s, 4H), 3.62 (s, 2H), 3.33 – 2.86 (m, 12H),  
8 2.00 – 1.76 (m, 2H). <sup>13</sup>C NMR (126 MHz, D<sub>2</sub>O) δ 175.13, 169.90, 152.05, 146.46, 124.00, 57.76,  
9 56.67, 52.85, 51.74, 51.69, 50.96, 50.90, 50.59, 36.34, 22.66. LC-MS (method 2): *t<sub>R</sub>*=2.39 min,  
10 *m/z* = 452.2 [M+H]<sup>+</sup>; calcd: 452.3.

11

### 12 **MnL3 complex preparation**

13 **L3** (0.02 mmol) was dissolved in water (2.0 mL), and the pH was adjusted to 6.5 by 0.1 M  
14 aqueous NaOH. Then solid MnCl<sub>2</sub>•4H<sub>2</sub>O (0.02 mmol) was added under stirring. The pH of the  
15 solution dropped to about 3.5, and the pH was adjusted back to 5.0 by addition of 1.5 M  
16 aqueous NaOAc. Completion of the chelation was confirmed by LC-MS. Any excess unchelated  
17 Mn<sup>2+</sup> was removed by Chelex 100 resin (pH 6.5). **MnL3** was then lyophilized to a powdery  
18 solid. **MnL3**: LC-MS (method 5): *t<sub>R</sub>*=8.02 min, *m/z* [M + H]<sup>+</sup> calcd for [C<sub>20</sub>H<sub>32</sub>N<sub>7</sub>O<sub>5</sub>Mn]<sup>+</sup>, 505.2;  
19 found 505.2, purity = 94% (250 nm UV detector).

20

### 21 **Kinetics of hydrazone/oxime formation**

22 The condensation reaction rate constants for reactions of MnL1, MnL2, MnL3, and GdOA with  
23 butyraldehyde were monitored spectrophotometrically via the increase of the 220/230 nm  
24 absorbance. All reactions were carried out at 25 °C in PBS. A series of experiments where the  
25 concentrations of probes were varied (0.04 mM, 0.06 mM, 0.08 mM, and 0.10 mM) to  
26 estimate the rate law. The probe was reacted with 1 mM butyraldehyde to ensure that the  
27 reaction proceeded under pseudo-first order with respect to the probe. For a second-order  
28 reaction, the observed rate constant (*k<sub>obs</sub>*) is the product of the second-order rate constant  
29 (*k*) and [butyraldehyde]. In this regard, the rate law and a corresponding *k* can be estimated  
30 by plotting reaction velocity as a function of [MnL1], [MnL2], [MnL3], and [GdOA]. All rate  
31 measurements are summarized in Supplementary Figure 1.

32

### 33 **Kinetics of hydrazone/oxime hydrolysis**

34 Hydrazones and oximes were prepared by mixing solution of each probe (1 mL, 1 mM, PBS,  
35 pH 7.4) with butyraldehyde (14.4 mg, 200 μmol), and the mixture was rocked gently at room  
36 temperature for 10 min, frozen with liquid N<sub>2</sub>, and lyophilized for 12 h. The obtained product  
37 was redissolved in 1 mL water. The HPLC trace of the resultant hydrazone or oxime was first  
38 measured. Then, a 37% stock solution of formaldehyde was added (final concentration: 200  
39 mM) to trap the liberated nitrogen base, and HPLC traces were obtained at desired time point.  
40 The extent of hydrolysis was quantified by monitoring the area under the hydrazone/oxime  
41 peak on HPLC trace, and the reactions were allowed to proceed to >95% completion.  
42 Hydrolysis of hydrazone/oxime is a first-order reaction and follows the rate law. Then the  
43 extent of hydrolysis was plotted as a function of time to calculate the hydrolysis rate constant.

44

### 45 **Relaxivity measurements**

46 Relaxivity measurements were performed on a Bruker mq60 Minispec, 1.4 T, NMR  
47 spectrometer at 37 °C. Longitudinal (T<sub>1</sub>) relaxation times were measured via an inversion

1 recovery experiment using 10 inversion times of duration ranging between 0.05 x T1 and 5 x  
2 T1; Longitudinal relaxivity ( $r_1$ ) was determined from the slope of a plot of  $1/T_1$  vs. [Mn]. Metal  
3 ion concentrations were determined by ICP-MS.  
4 MnL1, MnL2, MnL3, MnL4, and GdOA (concentration range: 0.05 mM – 0.2 mM) were  
5 incubated with BSA-Ald (21.9 mg mL<sup>-1</sup>, 0.6 mM aldehyde. Please see Supplementary  
6 Information for preparation details) or BSA (21.9 mg mL<sup>-1</sup>, 0.06 mM aldehyde) at 37°C for 3h,  
7 and then relaxivities were measured. Solutions of MnL1, MnL2, MnL3, MnL4, and GdOA  
8 (concentration range: 0.1 mM – 1.0 mM) in PBS were run in parallel as standard controls.  
9 After incubation of each probe with BSA and BSA-Ald, the unbound Mn and Gd probe was  
10 separated from the protein-bound probe by ultrafiltration (10 kDa cut-off PLCC cellulosic  
11 membrane, 10 min, 10,000 RPM). Following separation, the concentrated protein residue was  
12 diluted to a total volume of 300  $\mu$ L in PBS, and then relaxivities were immediately measured.  
13

#### 14 **Animals and experimental groups:**

15 C57Bl/6 adult male mice at 10-12 weeks of age were purchased from Charles River  
16 Laboratories, Wilmington MA. Animals were housed under a 12 h light/12 h dark cycle and  
17 provided with water and food ad libitum. The ambient temperature and relative humidity  
18 were 20–25 °C and 50–60%, respectively. All experiments and procedures were performed in  
19 accordance with the National Institutes of Health’s “Guide for the Care and Use of Laboratory  
20 Animals” and were approved by the Massachusetts General Hospital Institutional Animal Care  
21 and Use Committee. During MRI and PET scanning, animals were anesthetized with 1–2%  
22 isoflurane and air/oxygen mixture to maintain a constant respiration rate (60  $\pm$  10 breaths  
23 per minute), kept warm by a thermal pad, and monitored by a small animal physiological  
24 monitoring system (SA Instruments Inc., Stony Brook NY).  
25

26 A total of 117 C57Bl/6 mice were included in this study.

- 27 (1) 19 mice were included to study probe whole-body elimination.
- 28 (2) 57 mice were included to study lung fibrosis.
- 29 (3) 6 mice were included to study liver fibrosis.
- 30 (4) 35 mice were included to study kidney fibrosis

#### 31 **MR and PET image acquisition**

32 Briefly, the following MRI systems were utilized: (1) 4.7 T Bruker Biospec scanner with PET  
33 insert using custom-built volume coil, operating software: ParaVision 7.0 for MRI and  
34 ParaVision 360 for PET (2) 9.4T Bruker scanner (Bruker BioSpin) with a quadruple volume  
35 transmit/receiving coil, operating software: ParaVision 5.0. Pre-injection and post-injection  
36 MR images were acquired for comparison. Probes were administered via intravenous bolus  
37 injection at 0.1 mmol•kg<sup>-1</sup> body weight, with the bolus volume of injection never exceeding  
38 100  $\mu$ L. MR images were acquired with the following sequences and parameters:  
39  
40

41 Probe pharmacokinetics: A series of T1-weighted 3D Fast Low Angle Shot (FLASH,  
42 TR/TE/FA=10 ms/ 2.5 ms/ 12°, 0.4 mm isotropic spatial resolution, field of view (FOV) 60 mm  
43  $\times$  50 mm, one average, acquisition time = 2 min) were acquired before and dynamically after  
44 intravenous injection of the probe.  
45

46 Whole-body elimination: Static 30 min PET measurement was performed 24  $\pm$  0.5 h post  
47 administration of <sup>52/nat</sup>Mn complexes. The images were reconstructed using MLEM

1 (Maximum Likelihood Expectation Maximization) with 75 iterations and 0.75mm cubic voxels.  
2 During PET image acquisition, T1-weighted 3D FLASH (TR/TE/FA=21 ms/ 3 ms/ 12°, 0.25 mm  
3 isotropic spatial resolution, field of view (FOV) 60 × 85 × 50 mm<sup>3</sup>, one average, acquisition  
4 time = 2.2 min) images were acquired for the anatomical information.

5  
6 Lung imaging: 3D ultrashort time to echo (3D-UTE, TR/TE/FA=4 ms/ 11.75 μs/ 16°, 0.6 mm  
7 isotropic spatial resolution, field of view (FOV) 75 mm × 75 mm, one average, acquisition time  
8 = 3 min) images were acquired prior to and dynamically post injection of 0.1 mmol•kg<sup>-1</sup> probe;  
9 2D Rapid Acquisition with Relaxation Enhancement (2D-RARE, TR/TE/FA=1.5 s/ 8 ms/ 180°,  
10 resolution = 0.3 x 0.3 x 1 mm<sup>3</sup>, field of view (FOV) 60 mm × 50 mm, four averages, acquisition  
11 time = 3 min) and T1-weighted 3D FLASH (TR/TE/FA=10 ms/ 2.5 ms/ 30°, 0.6 mm isotropic  
12 spatial resolution, field of view (FOV) 60 mm × 50 mm, one average, acquisition time = 2 min)  
13 were acquired for anatomical information.

14  
15 Liver imaging: A series of T1-weighted 3D FLASH (TR/TE/FA=10 ms/ 2.5 ms/ 30°, 0.6 mm  
16 isotropic spatial resolution, field of view (FOV) 60 mm × 50 mm, one average, acquisition time  
17 = 2 min) were acquired prior to and dynamically after intravenous injection of MnL1.

18  
19 Kidney imaging: T1-map was acquired using a RARE sequence with various inversion times  
20 (TI): 9 TIs ranging from 7 ms to 5 s, TR 5 s, TE 7.26 ms, respiratory gated, FOV 30mm x 30mm,  
21 dimension 128 x 128, single slice with 0.75 mm slice thickness. Animals were first scanned for  
22 pre-injection T1-map. Mice were then removed from the magnet for probe injection and  
23 allowed to wake up and recover in a rodent cage. Four hours after probe injection, animals  
24 were returned to the scanner for post-injection T1-map acquisition.

25  
26 **MR and PET images analysis**  
27 MR and PET images were analyzed and shown using Horos (version 3.3.5) and Amide (version  
28 1.0.1) with the following protocol:

29  
30 Lung image analysis: 2D-RARE images and 3D-FLASH images were used to define regions of  
31 interest (ROIs) in the lung that excluded vessels and airways and these ROIs were copied to  
32 the UTE images for signal quantification. A total of 6 lung ROIs were defined on axial image  
33 slices spanning both lungs to obtain signal intensity (SI); ROIs in dorsal muscle in each slice  
34 were also defined as reference. We averaged the lung-to-muscle ratio (LMR, equation 1) from  
35 the 6 slices to calculate changes in LMR ( $\Delta$ LMR, equation 2).

36  
37 
$$\text{LMR} = \text{SI}_{\text{lung}} / \text{SI}_{\text{muscle}} \quad (1)$$

38  
39 
$$\Delta \text{LMR} = \text{LMR}_{\text{post}} - \text{LMR}_{\text{pre}} \quad (2)$$

40  
41 To measure the half-life of each probe in the lung,  $\Delta$ LMR values were monoexponentially fit  
42 to the following equation:

43  
44 
$$\Delta \text{LMR}_t = \Delta \text{LMR}_{10} e^{-k_{\text{obs}}/t} \quad (3)$$

45  
46 Where  $\Delta \text{LMR}_t$ , and  $\Delta \text{LMR}_{10}$  are the changes in lung-to-muscle ratio at time  $t$ , and at 10 min  
47 post-injection of probe. Equation (3) can be simplified to equation (4):

$$\ln(\Delta\text{LMR}_t/\Delta\text{LMR}_{10}) = -k_{\text{obs}}t \quad (4)$$

The washout  $T_{1/2}$  can be computed by equation (5):

$$T_{1/2} = \ln(2)/k_{\text{obs}} \quad (5)$$

Liver image analysis: A ROI was manually traced encompassing the liver parenchyma while avoiding major blood vessels. A second ROI was placed on the dorsal muscle visible in the same image slice to quantify the signal intensity in the muscle for comparison. Seven ROIs were placed in the field of view without any tissue (air) to measure the variation in background signal. 6 axial slices per mouse across the entire liver were analyzed in this fashion. Contrast to noise ratio (CNR, equation 6) was calculated by measuring the difference in signal intensity (SI) between liver and muscle and normalized to the standard deviation of the signal in the air.

$$\text{CNR} = (\text{SI}_{\text{liver}} - \text{SI}_{\text{muscle}}) / \text{SD}_{\text{air}} \quad (6)$$

$\Delta\text{CNR}$  was calculated by subtracting CNR measured prior to probe injection ( $\text{CNR}_{\text{pre}}$ ) from CNR measured after injection ( $\text{CNR}_{\text{post}}$ ).

$$\Delta\text{CNR} = \text{CNR}_{\text{post}} - \text{CNR}_{\text{pre}} \quad (7)$$

Kidney image analysis: ROIs for renal cortex and medulla were segmented based on signal contrast of the inversion recovery images. Pixel-by-pixel T1 maps over kidneys were obtained by fitting MR signals to TIs (equation 8):

$$\text{SI}_{\text{T1}} = M_0 \times (1 - M_1 e^{(-T/\text{T1})}) \quad (8)$$

T1 values for a given ROI were obtained by averaging the T1 values for individual pixels within that ROI, and then R1 values were calculated (equation 9).

$$R1 = 1/\text{T1} \quad (9)$$

Changes in R1 were calculated by equation 10:

$$\Delta R1 = R1_{\text{post}} - R1_{\text{pre}} \quad (10)$$

### Statistical analysis

GraphPad Prism (version 9.1.1) was used for statistical analyses. Comparisons were performed with unpaired Student's t-test to analyze differences between two groups, paired Student's t-test to analyze intraanimal differences, or one-way ANOVA with Tukey's post hoc comparison to analyze differences among three or more groups. Values of  $P < 0.05$  were considered statistically significant. Error bars are s.d. or 95% confidence interval, as indicated in the figure legends and main text. Sample sizes can be found in the figure legends and were chosen based on previous experience. Animals were fully randomized.

## 1 **Acknowledgments**

2 This work was supported by grants from the National Institutes of Health to P.C. (DK104302,  
3 DK121789, HL154125, OD028499, OD032138, OD025234, and OD023503), to E.A.  
4 (K01HL155237), to R.K. (K08HL140175) and by a Sponsored Research Agreement with Janssen.  
5 We thank Alana Ross for assistance with the biodistribution study.  
6

## 7 **Author contributions**

8 All the authors discussed the results and commented on the manuscript. H.M. and P.C.  
9 conceived the study, generated the hypotheses, and designed the experiments. H.M.  
10 synthesized all the probes. H.M., E.A., and H.W. carried out the in vitro analyses. I.A., R.K.,  
11 C.Z., M.D., and M.S. generated the animal models and collected the tissue samples. H.M.,  
12 I.Y.Z., Y.I.C., N.J.R., J.W.W., and B.F.M. performed the in vivo imaging and analyzed the data.  
13 Y.I.C. performed the MRI %SI map generation. M.D., A.T.B., S.Z., and P.P. performed the tissue  
14 allysine, hydroxyproline, and ICP analysis. K.K.T., L.P.H., R.G.V., and M.H. advised on animal  
15 models and study design. H.M. and P.C. wrote the manuscript. Correspondence and requests  
16 for materials should be addressed to P.C.  
17

## 18 **Ethics declarations**

### 19 Competing interests

20 H.M., E.A., and P.C. are inventors of a filed patent based on the work here (Molecular probes  
21 for in vivo detection of aldehydes. PCT/US2022/072310). P.C. has equity in and is a consultant  
22 to Collagen Medical LLC, has equity in Reveal Pharmaceuticals Inc., and has research support  
23 from Transcode Therapeutics, Pliant Therapeutics, Takeda, and Janssen. L.P.H. reports grants  
24 from Boehringer Ingelheim and has received personal consulting fees from Boehringer  
25 Ingelheim, Pliant Therapeutics, Bioclinica, and Biogen Idec. R.G.V., and M.K.H. are employed  
26 by Janssen. The other authors declare that they have no competing interests.  
27

## 28 **References**

- 29 1. Prescher JA, Bertozzi CR. Chemistry in living systems. *Nat. Chem. Biol.* **1**, 13-21 (2005).  
30
- 31 2. Shieh P, Bertozzi CR. Design strategies for bioorthogonal smart probes. *Organic &*  
32 *biomolecular chemistry* **12**, 9307-9320 (2014).  
33
- 34 3. Hang HC, Bertozzi CR. Ketone isosteres of 2-N-acetamidoglycans as substrates for  
35 metabolic cell surface engineering. *J. Am. Chem. Soc.* **123**, 1242-1243 (2001).  
36
- 37 4. Mahal LK, Yarema KJ, Bertozzi CR. Engineering chemical reactivity on cell surfaces through  
38 oligosaccharide biosynthesis. *Science* **276**, 1125-1128 (1997).  
39
- 40 5. Zeng Y, Ramya T, Dirksen A, Dawson PE, Paulson JC. High-efficiency labeling of sialylated  
41 glycoproteins on living cells. *Nat. Methods* **6**, 207-209 (2009).  
42
- 43 6. Sletten EM, Bertozzi CR. Bioorthogonal chemistry: fishing for selectivity in a sea of  
44 functionality. *Angew. Chem., Int. Ed.* **48**, 6974-6998 (2009).  
45
- 46 7. Reja RM, Wang W, Lyu Y, Haeffner F, Gao J. Lysine-targeting reversible covalent inhibitors  
47 with long residence time. *J. Am. Chem. Soc.* **144**, 1152-1157 (2022).

- 1
- 2 8. Aronoff MR, Hiebert P, Hentzen NB, Werner S, Wennemers H. Imaging and targeting LOX-
- 3 mediated tissue remodeling with a reactive collagen peptide. *Nat. Chem. Biol.* **17**, 865-
- 4 871 (2021).
- 5
- 6 9. Vallet SD, Ricard-Blum S. Lysyl oxidases: from enzyme activity to extracellular matrix cross-
- 7 links. *Essays Biochem.* **63**, 349-364 (2019).
- 8
- 9 10. Cai L, Xiong X, Kong X, Xie J. The role of the lysyl oxidases in tissue repair and remodeling:
- 10 a concise review. *Tissue Eng. Regener. Med.* **14**, 15-30 (2017).
- 11
- 12 11. Waghorn PA, Oliveira BL, Jones CM, Tager AM, Caravan P. High sensitivity HPLC method
- 13 for determination of the allysine concentration in tissue by use of a naphthol derivative.
- 14 *J. Chromatogr. B: Anal. Technol. Biomed. Life Sci.* **1064**, 7-13 (2017).
- 15
- 16 12. Ning Y, *et al.* Molecular MRI quantification of extracellular aldehyde pairs for early
- 17 detection of liver fibrogenesis and response to treatment. *Sci. Transl. Med.* **14**, eabq6297
- 18 (2022).
- 19
- 20 13. Friedman SL, Sheppard D, Duffield JS, Violette S. Therapy for fibrotic diseases: nearing the
- 21 starting line. *Sci. Transl. Med.* **5**, 167sr161-167sr161 (2013).
- 22
- 23 14. Rockey DC, Bell PD, Hill JA. Fibrosis—a common pathway to organ injury and failure. *N.*
- 24 *Engl. J. Med.* **372**, 1138-1149 (2015).
- 25
- 26 15. Dhar D, Baglieri J, Kisseleva T, Brenner DA. Mechanisms of liver fibrosis and its role in liver
- 27 cancer. *Exp. Biol. Med.* **245**, 96-108 (2020).
- 28
- 29 16. Valkenburg KC, De Groot AE, Pienta KJ. Targeting the tumour stroma to improve cancer
- 30 therapy. *Nat. Rev. Clin. Oncol.* **15**, 366-381 (2018).
- 31
- 32 17. Pellicoro A, Ramachandran P, Iredale JP, Fallowfield JA. Liver fibrosis and repair: immune
- 33 regulation of wound healing in a solid organ. *Nat. Rev. Immunol.* **14**, 181-194 (2014).
- 34
- 35 18. Liu Y. Cellular and molecular mechanisms of renal fibrosis. *Nat. Rev. Nephrol.* **7**, 684-696
- 36 (2011).
- 37
- 38 19. Segura AM, Frazier O, Buja LM. Fibrosis and heart failure. *Heart Failure Rev.* **19**, 173-185
- 39 (2014).
- 40
- 41 20. Martinez FJ, *et al.* Idiopathic pulmonary fibrosis. *Nat. Rev. Dis. Prim.* **3**, 1-19 (2017).
- 42
- 43 21. Manning DS, Afdhal NH. Diagnosis and quantitation of fibrosis. *Gastroenterology* **134**,
- 44 1670-1681 (2008).
- 45
- 46 22. Popov Y, Schuppan D. Targeting liver fibrosis: strategies for development and validation
- 47 of antifibrotic therapies. *Hepatology* **50**, 1294-1306 (2009).

- 1  
2 23. Waghorn PA, *et al.* Molecular Magnetic Resonance Imaging of Lung Fibrogenesis with an  
3 Oxyamine-Based Probe. *Angew. Chem., Int. Ed.* **129**, 9957-9960 (2017).  
4  
5 24. Akam EA, *et al.* Improving the reactivity of hydrazine-bearing MRI probes for in vivo  
6 imaging of lung fibrogenesis. *Chem. Sci.* **11**, 224-231 (2020).  
7  
8 25. Dang T, *et al.* Hydrazo - CEST: Hydrazone - Dependent Chemical Exchange Saturation  
9 Transfer Magnetic Resonance Imaging Contrast Agents. *Chem. - Eur. J.* **24**, 9148-9156  
10 (2018).  
11  
12 26. Brun EMSP-T, *et al.* Mapping vitamin B 6 metabolism by hydrazoCEST magnetic resonance  
13 imaging. *Chem. Commun.* **57**, 10867-10870 (2021).  
14  
15 27. Wahsner J, Gale EM, Rodríguez-Rodríguez A, Caravan P. Chemistry of MRI contrast agents:  
16 current challenges and new frontiers. *Chem. Rev.* **119**, 957-1057 (2018).  
17  
18 28. Botár R, Molnár E, Trencsényi Gr, Kiss J, Kálmán FK, Tircsó G. Stable and inert Mn (II)-based  
19 and pH-responsive contrast agents. *J. Am. Chem. Soc.* **142**, 1662-1666 (2020).  
20  
21 29. Kölmel DK, Kool ET. Oximes and hydrazones in bioconjugation: mechanism and catalysis.  
22 *Chem. Rev.* **117**, 10358-10376 (2017).  
23  
24 30. Kalia J, Raines RT. Hydrolytic stability of hydrazones and oximes. *Angew. Chem., Int. Ed.*  
25 **47**, 7523-7526 (2008).  
26  
27 31. Gale EM, Zhu J, Caravan P. Direct measurement of the mn (II) Hydration state in metal  
28 complexes and metalloproteins through <sup>17</sup>O NMR line widths. *J. Am. Chem. Soc.* **135**,  
29 18600-18608 (2013).  
30  
31 32. Levine RL. Oxidative modification of glutamine synthetase. II. Characterization of the  
32 ascorbate model system. *J. Biol. Chem.* **258**, 11828-11833 (1983).  
33  
34 33. Chao C-C, Ma Y-S, Stadtman ER. Modification of protein surface hydrophobicity and  
35 methionine oxidation by oxidative systems. *Proc. Natl. Acad. Sci.* **94**, 2969-2974 (1997).  
36  
37 34. Leussing D. The estimation of the stabilities of bivalent transition metal complexes and  
38 deviations from the irving-williams order. *Talanta* **4**, 264-267 (1960).  
39  
40 35. Zhou IY, *et al.* Positron Emission Tomography–Magnetic Resonance Imaging  
41 Pharmacokinetics, In Vivo Biodistribution, and Whole-Body Elimination of Mn-PyC3A.  
42 *Invest. Radiol.* **56**, 261-270 (2021).  
43  
44 36. Zhao X, Kwan JYY, Yip K, Liu PP, Liu F-F. Targeting metabolic dysregulation for fibrosis  
45 therapy. *Nat. Rev. Drug. Discov.* **19**, 57-75 (2020).  
46



- 1 37. Hayashi K, Fong KS, Mercier F, Boyd CD, Csiszar K, Hayashi M. Comparative  
2 immunocytochemical localization of lysyl oxidase (LOX) and the lysyl oxidase-like (LOXL)  
3 proteins: changes in the expression of LOXL during development and growth of mouse  
4 tissues. *J. Mol. Histol.* **35**, 845-855 (2004).  
5
- 6 38. Graves SA, *et al.* Novel preparation methods of <sup>52</sup>Mn for immunoPET imaging.  
7 *Bioconjugate Chem.* **26**, 2118-2124 (2015).  
8
- 9 39. Chen HH, *et al.* Molecular imaging of oxidized collagen quantifies pulmonary and hepatic  
10 fibrogenesis. *JCI insight* **2**, (2017).  
11
- 12 40. Albert RK, Schwartz DA. Revealing the secrets of idiopathic pulmonary fibrosis. *N. Engl. J.*  
13 *Med.* **380**, 94-96 (2019).  
14
- 15 41. Furuichi K, Gao J-L, Murphy PM. Chemokine receptor CX3CR1 regulates renal interstitial  
16 fibrosis after ischemia-reperfusion injury. *Am. J. Pathol.* **169**, 372-387 (2006).  
17
- 18 42. Li C, Kuemmerle JF. Mechanisms that mediate the development of fibrosis in patients with  
19 Crohn's disease. *Inflamm. Bowel Dis.* **20**, 1250-1258 (2014).  
20
- 21 43. Varrica C, Dias HS, Reis C, Carvalheiro M, Simões S. Targeted delivery in scleroderma  
22 fibrosis. *Autoimmun. Rev.* **20**, 102730 (2021).  
23
- 24 44. Wu B, Sodji QH, Oyelere AK. Inflammation, fibrosis and cancer: Mechanisms, therapeutic  
25 options and challenges. *Cancers* **14**, 552 (2022).  
26
- 27 45. Cotter TG, Rinella M. Nonalcoholic fatty liver disease 2020: the state of the disease.  
28 *Gastroenterology* **158**, 1851-1864 (2020).  
29
- 30 46. Cottin V, Richeldi L. Neglected evidence in idiopathic pulmonary fibrosis and the  
31 importance of early diagnosis and treatment. *Eur. Respir. Rev.* **23**, 106-110 (2014).  
32
- 33 47. Hariri LP, *et al.* The role of surgical lung biopsy in the diagnosis of fibrotic interstitial lung  
34 disease: Perspective from the pulmonary fibrosis foundation. *Ann. Am. Thorac. Soc.* **18**,  
35 1601-1609 (2021).  
36
- 37 48. Nandy S, *et al.* Diagnostic accuracy of endobronchial optical coherence tomography for  
38 the microscopic diagnosis of usual interstitial pneumonia. *Am. J. Respir. Crit. Care Med.*  
39 **204**, 1164-1179 (2021).  
40
- 41 49. Tapper EB, Loomba R. Noninvasive imaging biomarker assessment of liver fibrosis by  
42 elastography in NAFLD. *Nat. Rev. Gastroenterol. Hepatol.* **15**, 274-282 (2018).  
43
- 44 50. Sanyal AJ, *et al.* Non-Invasive biomarkers of nonalcoholic steatohepatitis: the FNIH  
45 NIMBLE project. *Nat. Med.* **28**, 430-432 (2022).  
46  
47
